# Supplementary material
Source: publisher figshare collection journal article supplement (https://gsajournals.figshare.com/articles/dataset/_/14778735)
Supplement: Supplementary file 1 [file 1]

## Sheet: completeness_report_v1.0
# Statistics of the completeness of the genome based on 248 CEGs #
	#Prots	%Completeness	-	#Total	Average	%Ortho
Complete	118	47.58	-	238	2.02	61.86
Group1	27	40.91	-	50	1.85	59.26
Group2	25	44.64	-	43	1.72	52
Group3	27	44.26	-	53	1.96	55.56
Group4	39	60	-	92	2.36	74.36
Partial	203	81.85	-	541	2.67	72.91		NB: complete proteins are also within Partial !!
Group1	51	77.27	-	105	2.06	58.82		so in total 203/248 CEGs of the ultra-core set are retrieved
Group2	44	78.57	-	113	2.57	79.55
Group3	53	86.89	-	150	2.83	77.36		The total set of CEGs is 458 proteins
Group4	55	84.62	-	173	3.15	76.36
# These results are based on the set of genes selected by Genis Parra #
# Key: #
# Prots = number of 248 ultra-conserved CEGs present in genome #
# %Completeness = percentage of 248 ultra-conserved CEGs present #
# Total = total number of CEGs present including putative orthologs #
# Average = average number of orthologs per CEG #
# %Ortho = percentage of detected CEGS that have more than 1 ortholog #

## Sheet: dbg2olc_runs
dirs:
/media/scratchpad_03/kaauw001/SEQUON/Acepa_1.0
/media/scratchpad_03/finke002/assembly/onion_v2/dbg2olc/
/media/scratchpad_02/kaauw001/SEQUON/reference
						Nr. Of sequences	scaffolds	degenerate				fraction deg.		assembly size (bytes)	assembly size (bytes)	Nr. Of scaffolds with KOG hit CEGMA (from v.1.0)
														NB: including CP & deg
														sequences (no min threshold on deg seq)
Acepa v1.0						21243231	8796960	12446271				0.585894		15653677625
Acepa_1.0_500						6184876	5301038	883837				0.142903			8800501621
Acepa_1.0_1000						2983998	2687864	296133				0.0992403			11088560315
	dbg2olc settings						in raw Backbone											Pacbio Reads in raw Backbone file:						pacbio reads (kmer statistics)		contigs
	input fasta	Kmersize	KmerCov	MinOverlap	Adapt Th	Nr. Input sequences	total scaffolds (+degenerates)	Of which deg.	fraction deg.	deduplicated scaffolds (+degenerates)		unique deg		Nr. Of CEGMA scf IDs (v1.0) in consensus INFO	assembly size (bytes)		Kmersize	total (reads)	unique (reads)	ratio (unique/total)	unique (amplicons)	ratio un.ampl/unique	ratio un.ampl/total	Total Kmers	Matching Unique Kmers		%
Acepa v1.0						21243231							Acepa v1.0	339		Acepa v1.0											#DIV/0!
dbg2olc (A.cepa.v2.0)	genome.ctg.fasta	17	2	20	0.005	8796960	11219580	0	0	4807092	0.428456	-	dbg2olc (A.cepa.v2.0)	296	14554880395	dbg2olc (A.cepa.v2.0)	17										#DIV/0!
dbg2olc 500	Acepa_1.0_500	17	2	20	0.005	6184876	8404054	1279061	0.152196	3454756	0.411082	480436	dbg2olc 500	290	14009323047	dbg2olc 500	17	55932715	13172028	0.235498	8232351	0.624987	0.147183				#DIV/0!
dbg2olc 500a	Acepa_1.0_500	19	2	20	0.005	6184876	16295074	2717704	0.166781	4599468	0.282261	661990	dbg2olc 500a	300	17500608117	dbg2olc 500a	19	68080794	15872277	0.233139	9559691	0.413554	0.0964154	180552676143	18264828423		0.101161
dbg2olc 1000	Acepa_1.0_1000	17	2	20	0.005	2983998	3201021	472003	0.147454	1981513	0.619025	187839	dbg2olc 1000	280	10943045011	dbg2olc 1000	17	38451496	10302769	0.267942	6564038
dbg2olc 1000a	Acepa_1.0_1000	15	5	20	0.0001	2983998	6375	646	0.101333	6364	0.998275	634	dbg2olc 1000a	4	107560343	dbg2olc 1000a	15							180625044095	6505934100		0.036019
dbg2olc 1000b	Acepa_1.0_1000	19	1	20	0.0001	2983998	5344349	1082348	0.202522	2415190	0.451915	231803	dbg2olc 1000b	293	16817815850	dbg2olc 1000b	19							180552676143	18519531008		0.102571
dbg2olc 1000c	Acepa_1.0_1000	17	2	10	0.0001	2983998	4523558	733251	0.162096	2193284	0.484858	207726	dbg2olc 1000c	292	19071810730	dbg2olc 1000c	17							180588860119	23237895348		0.128678
dbg2olc 1000d	Acepa_1.0_1000	15	2	20	0.0001	2983998	21016	2809	0.13366	20347	0.968167	2263	dbg2olc 1000d	25	467848484	dbg2olc 1000d	15							180625044095	6505934100		0.036019
dbg2olc 1000e	Acepa_1.0_1000	19	2	20	0.0001	2983998							dbg2olc 1000e			dbg2olc 1000e	19
dbg2olc 1000f	Acepa_1.0_1000	17	2	20	0.0001	2983998							dbg2olc 1000f			dbg2olc 1000f	17
dbg2olc 1000g	Acepa_1.0_1000	19	2	20	0.005	2983998	5196868	1058033	0.203591	2439466	0.469411	233147	dbg2olc 1000g	296	14476214675	dbg2olc 1000g	19	63636178	14428055	0.226727	8769676	0.607821	0.13781	180552676143	18519531008		0.102571
dbg2olc 1000h	Acepa_1.0_1000	17	2	20	0.001	2983998	3171766	588274	0.185472	2076969	0.65483	197592	dbg2olc 1000h	287	15215724626	dbg2olc 1000h	17	81375599	16666415	0.204809	9973882	0.598442	0.122566	180588860119	23237895348		0.128678
dbg2olc 1000i	Acepa_1.0_1000	21	2	20	0.005	2983998	6189195	1265352	0.204445	2495301	0.403171	238865	dbg2olc 1000i	295	15303044659	dbg2olc 1000i	21	69054639	14903848	0.215827	9010698	0.604589	0.130486	180516492167	10470302289		0.0580019
dbg2olc 1000j	Acepa_1.0_1000	23	2	20	0.005	2983998	6266911	1260802	0.201184	2493464	0.397878	238500	dbg2olc 1000j	298	15343165760	dbg2olc 1000j	23	68329347	14643729	0.214311	8867796	0.60557	0.12978	180480308191	6724499074		0.0372589
dbg2olc 1000k	Acepa_1.0_1000	25	2	20	0.005	2983998	5989216	1185538	0.197945	2476969	0.413571	236095	dbg2olc 1000k	296	15096535096	dbg2olc 1000k	25	65291979	14134205	0.216477	8592695	0.607936	0.131604	180444124215	5098379800		0.0282546

## Sheet: alternative runs
1000 <- Suggested Parameters Documentation
/usr/bin/time -v -o timeDBG2OLC.txt $DBG2OLC LD1 0 Contigs $SCAFFOLD k 17 KmerCovTh 2 MinOverlap 20 AdaptiveTh 0.005 f $PACBIO
1000a
/usr/bin/time -v -o timeDBG2OLC.txt $DBG2OLC LD1 0 Contigs $SCAFFOLD k 15 KmerCovTh 5 MinOverlap 20 AdaptiveTh 0.0001 RemoveChimera 1 f $PACBIO
1000b
/usr/bin/time -v -o timeDBG2OLC.txt $DBG2OLC LD1 0 Contigs $SCAFFOLD k 19 KmerCovTh 1 MinOverlap 20 AdaptiveTh 0.0001 f $PACBIO
1000c
/usr/bin/time -v -o timeDBG2OLC.txt $DBG2OLC LD1 0 Contigs $SCAFFOLD k 17 KmerCovTh 2 MinOverlap 10 AdaptiveTh 0.0001 f $PACBIO
1000d
/usr/bin/time -v -o timeDBG2OLC.txt $DBG2OLC LD1 0 Contigs $SCAFFOLD k 15 KmerCovTh 2 MinOverlap 20 AdaptiveTh 0.0001 f $PACBIO
1000e
/usr/bin/time -v -o timeDBG2OLC.txt $DBG2OLC LD1 0 Contigs $SCAFFOLD k 19 KmerCovTh 2 MinOverlap 20 AdaptiveTh 0.0001 f $PACBIO
1000f
/usr/bin/time -v -o timeDBG2OLC.txt $DBG2OLC LD1 0 Contigs $SCAFFOLD k 17 KmerCovTh 2 MinOverlap 20 AdaptiveTh 0.0001 f $PACBIO
1000g
/usr/bin/time -v -o timeDBG2OLC.txt $DBG2OLC LD1 0 Contigs $SCAFFOLD k 19 KmerCovTh 2 MinOverlap 20 AdaptiveTh 0.005 f $PACBIO
1000h
/usr/bin/time -v -o timeDBG2OLC.txt $DBG2OLC LD1 0 Contigs $SCAFFOLD k 17 KmerCovTh 2 MinOverlap 20 AdaptiveTh 0.001 f $PACBIO
500
/usr/bin/time -v -o timeDBG2OLC.txt $DBG2OLC LD1 0 Contigs $SCAFFOLD k 17 KmerCovTh 2 MinOverlap 20 AdaptiveTh 0.005 f $PACBIO
500a
/usr/bin/time -v -o timeDBG2OLC.txt $DBG2OLC LD1 0 Contigs $SCAFFOLD k 19 KmerCovTh 2 MinOverlap 20 AdaptiveTh 0.005 f $PACBIO

## Sheet: missing KOG scf IDs
	output.1000.txt	output.1000a.txt	output.1000b.txt	output.1000c.txt	output.1000d.txt	output.1000e.txt	output.1000f.txt	output.1000g.txt	output.1000h.txt	output.500.txt	output.500a.txt
	scf7180042494986	scf7180042487813	scf7180042487813	scf7180042487813	scf7180042487813			scf7180042489082	scf7180042487813	scf7180042499891
	scf7180042505676	scf7180042488420	scf7180042523606	scf7180042489082	scf7180042488420			scf7180042523606	scf7180042489082	scf7180042523606
	scf7180042523606	scf7180042489082	scf7180042532892	scf7180042494986	scf7180042489082			scf7180042551875	scf7180042494986	scf7180042532319
	scf7180042551875	scf7180042490245	scf7180042551875	scf7180042521378	scf7180042490245			scf7180042602792	scf7180042521378	scf7180042551875
	scf7180042574209	scf7180042490792	scf7180042602792	scf7180042523606	scf7180042490792			scf7180042631830	scf7180042523606	scf7180042574209
	scf7180042587263	scf7180042491554	scf7180042631830	scf7180042534987	scf7180042491554			scf7180042706431	scf7180042534987	scf7180042602792
	scf7180042594350	scf7180042492536	scf7180042632111	scf7180042551875	scf7180042492536			scf7180042714373	scf7180042551875	scf7180042631830
	scf7180042602792	scf7180042494986	scf7180042714373	scf7180042566503	scf7180042494986			scf7180042729835	scf7180042566503	scf7180042633570
	scf7180042603512	scf7180042497526	scf7180042729835	scf7180042602792	scf7180042497526			scf7180042832855	scf7180042602792	scf7180042714373
	scf7180042631830	scf7180042497937	scf7180042768444	scf7180042631830	scf7180042497937			scf7180043030721	scf7180042603512	scf7180042729835
	scf7180042633570	scf7180042499891	scf7180042831791	scf7180042677980	scf7180042499891			scf7180043185088	scf7180042629605	scf7180042755928
	scf7180042714373	scf7180042500129	scf7180042840086	scf7180042714373	scf7180042500129			scf7180043220922	scf7180042631830	scf7180042831791
	scf7180042729835	scf7180042500511	scf7180043185088	scf7180042729835	scf7180042500511			scf7180043292122	scf7180042632111	scf7180042924497
	scf7180042758546	scf7180042502392	scf7180043194621	scf7180042840086	scf7180042502392			scf7180043502554	scf7180042677980	scf7180042924765
	scf7180042762495	scf7180042502770	scf7180043292122	scf7180043185088	scf7180042502770			scf7180043684923	scf7180042706431	scf7180043029263
	scf7180042924497	scf7180042505528	scf7180043502554	scf7180043194621	scf7180042505528			scf7180043690598	scf7180042714373	scf7180043041251
	scf7180042924765	scf7180042505676	scf7180043684923	scf7180043215550	scf7180042505676			scf7180043701805	scf7180042729835	scf7180043043522
	scf7180042938275	scf7180042506896	scf7180043690598	scf7180043224623	scf7180042506896			scf7180043713012	scf7180042917833	scf7180043185088
	scf7180043029263	scf7180042508808	scf7180043713012	scf7180043292122	scf7180042508808			scf7180043776891	scf7180042924497	scf7180043224623
	scf7180043041251	scf7180042512679	scf7180043734481	scf7180043502554	scf7180042512679			scf7180043803264	scf7180043185088	scf7180043292122
	scf7180043185088	scf7180042517621	scf7180043776891	scf7180043684923	scf7180042517621			scf7180043863741	scf7180043224623	scf7180043400835
	scf7180043194621	scf7180042519268	scf7180043803264	scf7180043690598	scf7180042519268			scf7180043878497	scf7180043292122	scf7180043419768
	scf7180043220922	scf7180042520676	scf7180043863741	scf7180043713012	scf7180042520676			scf7180044134534	scf7180043393767	scf7180043502554
	scf7180043224623	scf7180042521378	scf7180043878497	scf7180043740125	scf7180042521378			scf7180044209722	scf7180043396159	scf7180043684923
	scf7180043292122	scf7180042523606	scf7180044134534	scf7180043776891	scf7180042523606			scf7180044697643	scf7180043400835	scf7180043690598
	scf7180043393767	scf7180042524170	scf7180044209722	scf7180043803264	scf7180042524170			scf7180044735823	scf7180043502554	scf7180043713012
	scf7180043400835	scf7180042524711	scf7180044686304	scf7180043863741	scf7180042524711			scf7180044898120	scf7180043684923	scf7180043776891
	scf7180043502554	scf7180042531712	scf7180044735823	scf7180043878497	scf7180042531712			scf7180044912620	scf7180043690598	scf7180043803264
	scf7180043684923	scf7180042532009	scf7180044769026	scf7180044111461	scf7180042532009			scf7180044943173	scf7180043701805	scf7180043863741
	scf7180043690598	scf7180042532319	scf7180044912620	scf7180044134534	scf7180042532319			scf7180044966580	scf7180043713012	scf7180043878497
	scf7180043701805	scf7180042532892	scf7180044943173	scf7180044209722	scf7180042532892			scf7180045050770	scf7180043776891	scf7180044114482
	scf7180043713012	scf7180042534987	scf7180044966580	scf7180044735823	scf7180042534987			scf7180046302773	scf7180043803264	scf7180044134534
	scf7180043776891	scf7180042535365	scf7180045050770	scf7180044898120	scf7180042535365			scf7180046388415	scf7180043863741	scf7180044209722
	scf7180043803264	scf7180042535524	scf7180046302773	scf7180044912620	scf7180042535524			scf7180046812034	scf7180043878497	scf7180044735823
	scf7180043863741	scf7180042540769	scf7180046388415	scf7180044943173	scf7180042540769			scf7180046952905	scf7180044134534	scf7180044898120
	scf7180043878497	scf7180042540779	scf7180046785064	scf7180044966580	scf7180042540779			scf7180047160251	scf7180044209722	scf7180044912620
	scf7180044134534	scf7180042541807	scf7180046812034	scf7180045050770	scf7180042541807			scf7180048697209	scf7180044735823	scf7180044943173
	scf7180044209722	scf7180042542321	scf7180046952905	scf7180046302773	scf7180042542321			scf7180048744466	scf7180044912620	scf7180044966580
	scf7180044735823	scf7180042544300	scf7180047160251	scf7180046388415	scf7180042544300			scf7180050625254	scf7180044943173	scf7180046302773
	scf7180044912620	scf7180042546343	scf7180048496221	scf7180046812034	scf7180042546343			scf7180050632747	scf7180044966580	scf7180046812034
	scf7180044943173	scf7180042551642	scf7180048697209	scf7180046952905	scf7180042551714			scf7180050656228	scf7180045050770	scf7180046952905
	scf7180044966580	scf7180042551714	scf7180048744466	scf7180047160251	scf7180042551875			scf7180050738316	scf7180046302773	scf7180047160251
	scf7180045050770	scf7180042551875	scf7180050625254	scf7180048697209	scf7180042552278			scf7180050890014	scf7180046388415	scf7180048496221
	scf7180045527545	scf7180042552278	scf7180050656228	scf7180048744466	scf7180042554375				scf7180046812034	scf7180048697209
	scf7180046302773	scf7180042554375	scf7180050738316	scf7180050625254	scf7180042554936				scf7180046952905	scf7180050625254
	scf7180046388415	scf7180042554936	scf7180050890014	scf7180050738316	scf7180042565213				scf7180047160251	scf7180050656228
	scf7180046752351	scf7180042565213		scf7180050890014	scf7180042565626				scf7180048469075	scf7180050738316
	scf7180046753180	scf7180042565626			scf7180042565715				scf7180048697209	scf7180050890014
	scf7180046812034	scf7180042565715			scf7180042566503				scf7180048744466	scf7180051018318
	scf7180046952905	scf7180042566503			scf7180042567094				scf7180050625254
	scf7180047160251	scf7180042567094			scf7180042567475				scf7180050738316
	scf7180048496221	scf7180042567475			scf7180042567662				scf7180050890014
	scf7180048697209	scf7180042567662			scf7180042567703
	scf7180048744466	scf7180042567703			scf7180042568517
	scf7180050625254	scf7180042568517			scf7180042570137
	scf7180050630530	scf7180042570137			scf7180042574209
	scf7180050656228	scf7180042574209			scf7180042583035
	scf7180050738316	scf7180042583035			scf7180042584245
	scf7180050890014	scf7180042584245			scf7180042585733
		scf7180042585733			scf7180042587263
		scf7180042587263			scf7180042594350
		scf7180042594350			scf7180042602792
		scf7180042602792			scf7180042602994
		scf7180042602994			scf7180042603512
		scf7180042603512			scf7180042604655
		scf7180042604655			scf7180042604859
		scf7180042604859			scf7180042605100
		scf7180042605100			scf7180042605101
		scf7180042605101			scf7180042605807
		scf7180042605807			scf7180042607807
		scf7180042607807			scf7180042629417
		scf7180042629417			scf7180042629491
		scf7180042629491			scf7180042629844
		scf7180042629605			scf7180042630691
		scf7180042629844			scf7180042630829
		scf7180042630691			scf7180042631830
		scf7180042630829			scf7180042632111
		scf7180042631830			scf7180042632309
		scf7180042632111			scf7180042632950
		scf7180042632309			scf7180042633570
		scf7180042632950			scf7180042635847
		scf7180042633570			scf7180042635980
		scf7180042635847			scf7180042636591
		scf7180042635980			scf7180042639123
		scf7180042636591			scf7180042656045
		scf7180042639123			scf7180042662591
		scf7180042656045			scf7180042663028
		scf7180042662591			scf7180042663061
		scf7180042663028			scf7180042664750
		scf7180042663061			scf7180042665498
		scf7180042664750			scf7180042665582
		scf7180042665498			scf7180042667054
		scf7180042665582			scf7180042668414
		scf7180042667054			scf7180042677980
		scf7180042668414			scf7180042706431
		scf7180042671123			scf7180042708539
		scf7180042677980			scf7180042708734
		scf7180042706431			scf7180042708749
		scf7180042708539			scf7180042709189
		scf7180042708734			scf7180042710605
		scf7180042708749			scf7180042711299
		scf7180042709189			scf7180042714373
		scf7180042710605			scf7180042715277
		scf7180042711299			scf7180042716258
		scf7180042714373			scf7180042718270
		scf7180042715277			scf7180042725848
		scf7180042716258			scf7180042729835
		scf7180042718270			scf7180042744356
		scf7180042725848			scf7180042746965
		scf7180042729835			scf7180042755928
		scf7180042744356			scf7180042757715
		scf7180042746965			scf7180042757919
		scf7180042755928			scf7180042758546
		scf7180042757480			scf7180042762495
		scf7180042757715			scf7180042764384
		scf7180042757919			scf7180042767104
		scf7180042758546			scf7180042768444
		scf7180042760092			scf7180042768601
		scf7180042762495			scf7180042769982
		scf7180042764384			scf7180042771151
		scf7180042767104			scf7180042777854
		scf7180042768444			scf7180042823689
		scf7180042768601			scf7180042823950
		scf7180042769982			scf7180042823971
		scf7180042771151			scf7180042824733
		scf7180042777854			scf7180042825417
		scf7180042823689			scf7180042829159
		scf7180042823950			scf7180042831062
		scf7180042823971			scf7180042831791
		scf7180042824733			scf7180042832855
		scf7180042825417			scf7180042840086
		scf7180042829159			scf7180042872167
		scf7180042831062			scf7180042912254
		scf7180042831791			scf7180042916884
		scf7180042832855			scf7180042916978
		scf7180042840086			scf7180042917833
		scf7180042872167			scf7180042924038
		scf7180042912254			scf7180042924497
		scf7180042916884			scf7180042924765
		scf7180042916978			scf7180042924824
		scf7180042917833			scf7180042938275
		scf7180042924038			scf7180042948702
		scf7180042924497			scf7180043029263
		scf7180042924765			scf7180043029339
		scf7180042924824			scf7180043029755
		scf7180042938275			scf7180043030721
		scf7180042948702			scf7180043032276
		scf7180043029263			scf7180043037960
		scf7180043029339			scf7180043041251
		scf7180043029755			scf7180043042546
		scf7180043030721			scf7180043043522
		scf7180043032276			scf7180043046599
		scf7180043032290			scf7180043053925
		scf7180043035945			scf7180043066319
		scf7180043037960			scf7180043185088
		scf7180043041251			scf7180043186853
		scf7180043042546			scf7180043186960
		scf7180043043522			scf7180043187022
		scf7180043046599			scf7180043190005
		scf7180043053925			scf7180043193983
		scf7180043066319			scf7180043195577
		scf7180043185088			scf7180043195770
		scf7180043186853			scf7180043195831
		scf7180043186960			scf7180043204792
		scf7180043187022			scf7180043214795
		scf7180043190005			scf7180043215550
		scf7180043193983			scf7180043220922
		scf7180043194621			scf7180043224615
		scf7180043195577			scf7180043224623
		scf7180043195770			scf7180043233431
		scf7180043195831			scf7180043292122
		scf7180043204792			scf7180043393767
		scf7180043214795			scf7180043393826
		scf7180043215550			scf7180043396159
		scf7180043220922			scf7180043398586
		scf7180043224615			scf7180043400835
		scf7180043224623			scf7180043402540
		scf7180043233431			scf7180043402632
		scf7180043292122			scf7180043407190
		scf7180043393767			scf7180043410333
		scf7180043393826			scf7180043410762
		scf7180043396159			scf7180043414473
		scf7180043398586			scf7180043418305
		scf7180043400835			scf7180043419505
		scf7180043402540			scf7180043419768
		scf7180043402632			scf7180043433398
		scf7180043407190			scf7180043437329
		scf7180043410333			scf7180043455988
		scf7180043410762			scf7180043502554
		scf7180043411356			scf7180043684590
		scf7180043413238			scf7180043684748
		scf7180043414473			scf7180043684923
		scf7180043418305			scf7180043686295
		scf7180043418796			scf7180043686317
		scf7180043419505			scf7180043689942
		scf7180043419768			scf7180043690598
		scf7180043433398			scf7180043691495
		scf7180043437329			scf7180043700957
		scf7180043455988			scf7180043701517
		scf7180043502554			scf7180043701805
		scf7180043684590			scf7180043706770
		scf7180043684748			scf7180043707007
		scf7180043684923			scf7180043711146
		scf7180043686295			scf7180043713012
		scf7180043686317			scf7180043720146
		scf7180043689942			scf7180043723986
		scf7180043690598			scf7180043727006
		scf7180043691495			scf7180043734481
		scf7180043698668			scf7180043734758
		scf7180043700957			scf7180043740125
		scf7180043701517			scf7180043753399
		scf7180043701805			scf7180043769752
		scf7180043706770			scf7180043776891
		scf7180043707007			scf7180043780866
		scf7180043711146			scf7180043803264
		scf7180043713012			scf7180043863741
		scf7180043718731			scf7180043878497
		scf7180043720146			scf7180044096800
		scf7180043723986			scf7180044097927
		scf7180043727006			scf7180044106219
		scf7180043734481			scf7180044111275
		scf7180043734758			scf7180044111461
		scf7180043740125			scf7180044113177
		scf7180043753399			scf7180044113597
		scf7180043769752			scf7180044114951
		scf7180043776891			scf7180044120414
		scf7180043780866			scf7180044123199
		scf7180043803264			scf7180044128050
		scf7180043863741			scf7180044133456
		scf7180043878497			scf7180044134534
		scf7180044096800			scf7180044134535
		scf7180044097927			scf7180044138066
		scf7180044106219			scf7180044155553
		scf7180044111275			scf7180044209722
		scf7180044111461			scf7180044236102
		scf7180044113177			scf7180044680283
		scf7180044113597			scf7180044684081
		scf7180044114482			scf7180044684847
		scf7180044114951			scf7180044686304
		scf7180044120414			scf7180044689982
		scf7180044123199			scf7180044690651
		scf7180044128050			scf7180044690912
		scf7180044133456			scf7180044697643
		scf7180044134534			scf7180044707871
		scf7180044134535			scf7180044735823
		scf7180044138066			scf7180044737013
		scf7180044155553			scf7180044744262
		scf7180044209722			scf7180044745789
		scf7180044236102			scf7180044746433
		scf7180044680283			scf7180044769026
		scf7180044682364			scf7180044771821
		scf7180044684081			scf7180044773788
		scf7180044684847			scf7180044774118
		scf7180044686304			scf7180044898120
		scf7180044689982			scf7180044912620
		scf7180044690651			scf7180044943173
		scf7180044690912			scf7180044966580
		scf7180044691729			scf7180045050770
		scf7180044697643			scf7180045527545
		scf7180044703488			scf7180045529631
		scf7180044707871			scf7180045532710
		scf7180044735823			scf7180045533954
		scf7180044737013			scf7180045534012
		scf7180044744262			scf7180045538187
		scf7180044745789			scf7180045538898
		scf7180044746433			scf7180045547170
		scf7180044769026			scf7180045548507
		scf7180044771821			scf7180045564805
		scf7180044773788			scf7180045565985
		scf7180044774118			scf7180045580271
		scf7180044898120			scf7180045587131
		scf7180044912620			scf7180045590894
		scf7180044943173			scf7180045592182
		scf7180044966580			scf7180045620138
		scf7180045050770			scf7180045628270
		scf7180045527545			scf7180045629759
		scf7180045529631			scf7180046302773
		scf7180045531272			scf7180046388415
		scf7180045532710			scf7180046728187
		scf7180045533954			scf7180046730009
		scf7180045534012			scf7180046730348
		scf7180045538187			scf7180046752351
		scf7180045538898			scf7180046753180
		scf7180045547170			scf7180046756028
		scf7180045548507			scf7180046770881
		scf7180045564805			scf7180046785064
		scf7180045565985			scf7180046793872
		scf7180045580271			scf7180046812034
		scf7180045587131			scf7180046813258
		scf7180045590894			scf7180046816278
		scf7180045592182			scf7180046952905
		scf7180045620138			scf7180047160251
		scf7180045628270			scf7180048403789
		scf7180045629759			scf7180048417602
		scf7180046302773			scf7180048437854
		scf7180046388415			scf7180048440485
		scf7180046728187			scf7180048444103
		scf7180046730009			scf7180048456905
		scf7180046730348			scf7180048460522
		scf7180046752351			scf7180048464245
		scf7180046753180			scf7180048469075
		scf7180046756028			scf7180048477801
		scf7180046770881			scf7180048496221
		scf7180046785064			scf7180048509330
		scf7180046793872			scf7180048515927
		scf7180046812034			scf7180048697209
		scf7180046813258			scf7180048744466
		scf7180046816278			scf7180050625254
		scf7180046825955			scf7180050630530
		scf7180046855562			scf7180050632747
		scf7180046952905			scf7180050656228
		scf7180047160251			scf7180050738316
		scf7180048403789			scf7180050890014
		scf7180048417602			scf7180051018318
		scf7180048437854
		scf7180048439906
		scf7180048440485
		scf7180048444103
		scf7180048456905
		scf7180048460522
		scf7180048464245
		scf7180048469075
		scf7180048477801
		scf7180048496221
		scf7180048509330
		scf7180048515927
		scf7180048697209
		scf7180048744466
		scf7180050625254
		scf7180050630530
		scf7180050632747
		scf7180050656228
		scf7180050738316
		scf7180050890014
		scf7180051018318

## Sheet: CEGMAv1.0-scaffolds.txt
kmerSize				17	19	17			19	17	17
KmerCov				2	1	2			2	2	2
Overlap				20	20	10			20	20	20
KmerAdapThr				0.005	0.0001	0.0001			0.005	0.001	0.005
Nr.scf present				280	293	292	0	0	296	287	290
nr. Missing	present	CEGMAv1.0-scaffolds.txt	Length	output.1000.txt	output.1000b.txt	output.1000c.txt	output.1000e.txt	output.1000f.txt	output.1000g.txt	output.1000h.txt	output.500.txt	output.500a.txt	output.1000a.txt	output.1000d.txt
3	3	scf7180042487813	17365	#N/A	scf7180042487813	scf7180042487813			#N/A	scf7180042487813	#N/A		scf7180042487813
0	6	scf7180042488420	25097	#N/A	#N/A	#N/A			#N/A	#N/A	#N/A		scf7180042488420
3	3	scf7180042489082	15649	#N/A	#N/A	scf7180042489082			scf7180042489082	scf7180042489082	#N/A		scf7180042489082
0	6	scf7180042490245	22988	#N/A	#N/A	#N/A			#N/A	#N/A	#N/A		scf7180042490245
0	6	scf7180042490792	21739	#N/A	#N/A	#N/A			#N/A	#N/A	#N/A		scf7180042490792
0	6	scf7180042491554	19406	#N/A	#N/A	#N/A			#N/A	#N/A	#N/A		scf7180042491554
0	6	scf7180042492536	22812	#N/A	#N/A	#N/A			#N/A	#N/A	#N/A		scf7180042492536
3	3	scf7180042494986	18126	scf7180042494986	#N/A	scf7180042494986			#N/A	scf7180042494986	#N/A		scf7180042494986
0	6	scf7180042497526	14458	#N/A	#N/A	#N/A			#N/A	#N/A	#N/A		scf7180042497526
0	6	scf7180042497937	14500	#N/A	#N/A	#N/A			#N/A	#N/A	#N/A		scf7180042497937
1	5	scf7180042499891	16905	#N/A	#N/A	#N/A			#N/A	#N/A	scf7180042499891		scf7180042499891
0	6	scf7180042500129	16340	#N/A	#N/A	#N/A			#N/A	#N/A	#N/A		scf7180042500129
0	6	scf7180042500511	12424	#N/A	#N/A	#N/A			#N/A	#N/A	#N/A		scf7180042500511
0	6	scf7180042502392	20803	#N/A	#N/A	#N/A			#N/A	#N/A	#N/A		scf7180042502392
0	6	scf7180042502770	9779	#N/A	#N/A	#N/A			#N/A	#N/A	#N/A		scf7180042502770
0	6	scf7180042505528	13983	#N/A	#N/A	#N/A			#N/A	#N/A	#N/A		scf7180042505528
1	5	scf7180042505676	11592	scf7180042505676	#N/A	#N/A			#N/A	#N/A	#N/A		scf7180042505676
0	6	scf7180042506896	9494	#N/A	#N/A	#N/A			#N/A	#N/A	#N/A		scf7180042506896
0	6	scf7180042508808	17178	#N/A	#N/A	#N/A			#N/A	#N/A	#N/A		scf7180042508808
0	6	scf7180042512679	11801	#N/A	#N/A	#N/A			#N/A	#N/A	#N/A		scf7180042512679
0	6	scf7180042517621	16242	#N/A	#N/A	#N/A			#N/A	#N/A	#N/A		scf7180042517621
0	6	scf7180042519268	11465	#N/A	#N/A	#N/A			#N/A	#N/A	#N/A		scf7180042519268
0	6	scf7180042520676	5394	#N/A	#N/A	#N/A			#N/A	#N/A	#N/A		scf7180042520676
2	4	scf7180042521378	10078	#N/A	#N/A	scf7180042521378			#N/A	scf7180042521378	#N/A		scf7180042521378
6	0	scf7180042523606	14643	scf7180042523606	scf7180042523606	scf7180042523606			scf7180042523606	scf7180042523606	scf7180042523606		scf7180042523606
0	6	scf7180042524170	10016	#N/A	#N/A	#N/A			#N/A	#N/A	#N/A		scf7180042524170
0	6	scf7180042524711	14908	#N/A	#N/A	#N/A			#N/A	#N/A	#N/A		scf7180042524711
0	6	scf7180042531712	11223	#N/A	#N/A	#N/A			#N/A	#N/A	#N/A		scf7180042531712
0	6	scf7180042532009	12217	#N/A	#N/A	#N/A			#N/A	#N/A	#N/A		scf7180042532009
1	5	scf7180042532319	13314	#N/A	#N/A	#N/A			#N/A	#N/A	scf7180042532319		scf7180042532319
1	5	scf7180042532892	13670	#N/A	scf7180042532892	#N/A			#N/A	#N/A	#N/A		scf7180042532892
2	4	scf7180042534987	13118	#N/A	#N/A	scf7180042534987			#N/A	scf7180042534987	#N/A		scf7180042534987
0	6	scf7180042535365	10420	#N/A	#N/A	#N/A			#N/A	#N/A	#N/A		scf7180042535365
0	6	scf7180042535524	12237	#N/A	#N/A	#N/A			#N/A	#N/A	#N/A		scf7180042535524
0	6	scf7180042540769	10636	#N/A	#N/A	#N/A			#N/A	#N/A	#N/A		scf7180042540769
0	6	scf7180042540779	12671	#N/A	#N/A	#N/A			#N/A	#N/A	#N/A		scf7180042540779
0	6	scf7180042541807	12957	#N/A	#N/A	#N/A			#N/A	#N/A	#N/A		scf7180042541807
0	6	scf7180042542321	11046	#N/A	#N/A	#N/A			#N/A	#N/A	#N/A		scf7180042542321
0	6	scf7180042544300	11414	#N/A	#N/A	#N/A			#N/A	#N/A	#N/A		scf7180042544300
0	6	scf7180042546343	9022	#N/A	#N/A	#N/A			#N/A	#N/A	#N/A		scf7180042546343
0	6	scf7180042551642	10936	#N/A	#N/A	#N/A			#N/A	#N/A	#N/A		scf7180042551642
0	6	scf7180042551714	10262	#N/A	#N/A	#N/A			#N/A	#N/A	#N/A		scf7180042551714
6	0	scf7180042551875	13345	scf7180042551875	scf7180042551875	scf7180042551875			scf7180042551875	scf7180042551875	scf7180042551875		scf7180042551875
0	6	scf7180042552278	9862	#N/A	#N/A	#N/A			#N/A	#N/A	#N/A		scf7180042552278
0	6	scf7180042554375	12244	#N/A	#N/A	#N/A			#N/A	#N/A	#N/A		scf7180042554375
0	6	scf7180042554936	12387	#N/A	#N/A	#N/A			#N/A	#N/A	#N/A		scf7180042554936
0	6	scf7180042565213	12490	#N/A	#N/A	#N/A			#N/A	#N/A	#N/A		scf7180042565213
0	6	scf7180042565626	11070	#N/A	#N/A	#N/A			#N/A	#N/A	#N/A		scf7180042565626
0	6	scf7180042565715	12466	#N/A	#N/A	#N/A			#N/A	#N/A	#N/A		scf7180042565715
2	4	scf7180042566503	11909	#N/A	#N/A	scf7180042566503			#N/A	scf7180042566503	#N/A		scf7180042566503
0	6	scf7180042567094	9740	#N/A	#N/A	#N/A			#N/A	#N/A	#N/A		scf7180042567094
0	6	scf7180042567475	12728	#N/A	#N/A	#N/A			#N/A	#N/A	#N/A		scf7180042567475
0	6	scf7180042567662	13538	#N/A	#N/A	#N/A			#N/A	#N/A	#N/A		scf7180042567662
0	6	scf7180042567703	12212	#N/A	#N/A	#N/A			#N/A	#N/A	#N/A		scf7180042567703
0	6	scf7180042568517	11979	#N/A	#N/A	#N/A			#N/A	#N/A	#N/A		scf7180042568517
0	6	scf7180042570137	12480	#N/A	#N/A	#N/A			#N/A	#N/A	#N/A		scf7180042570137
2	4	scf7180042574209	5765	scf7180042574209	#N/A	#N/A			#N/A	#N/A	scf7180042574209		scf7180042574209
0	6	scf7180042583035	12765	#N/A	#N/A	#N/A			#N/A	#N/A	#N/A		scf7180042583035
0	6	scf7180042584245	11410	#N/A	#N/A	#N/A			#N/A	#N/A	#N/A		scf7180042584245
0	6	scf7180042585733	12123	#N/A	#N/A	#N/A			#N/A	#N/A	#N/A		scf7180042585733
1	5	scf7180042587263	12860	scf7180042587263	#N/A	#N/A			#N/A	#N/A	#N/A		scf7180042587263
1	5	scf7180042594350	4716	scf7180042594350	#N/A	#N/A			#N/A	#N/A	#N/A		scf7180042594350
6	0	scf7180042602792	15365	scf7180042602792	scf7180042602792	scf7180042602792			scf7180042602792	scf7180042602792	scf7180042602792		scf7180042602792
0	6	scf7180042602994	12407	#N/A	#N/A	#N/A			#N/A	#N/A	#N/A		scf7180042602994
2	4	scf7180042603512	10632	scf7180042603512	#N/A	#N/A			#N/A	scf7180042603512	#N/A		scf7180042603512
0	6	scf7180042604655	9374	#N/A	#N/A	#N/A			#N/A	#N/A	#N/A		scf7180042604655
0	6	scf7180042604859	11946	#N/A	#N/A	#N/A			#N/A	#N/A	#N/A		scf7180042604859
0	6	scf7180042605100	10204	#N/A	#N/A	#N/A			#N/A	#N/A	#N/A		scf7180042605100
0	6	scf7180042605101	10033	#N/A	#N/A	#N/A			#N/A	#N/A	#N/A		scf7180042605101
0	6	scf7180042605807	10423	#N/A	#N/A	#N/A			#N/A	#N/A	#N/A		scf7180042605807
0	6	scf7180042607807	12447	#N/A	#N/A	#N/A			#N/A	#N/A	#N/A		scf7180042607807
0	6	scf7180042629417	11154	#N/A	#N/A	#N/A			#N/A	#N/A	#N/A		scf7180042629417
0	6	scf7180042629491	10627	#N/A	#N/A	#N/A			#N/A	#N/A	#N/A		scf7180042629491
1	5	scf7180042629605	10123	#N/A	#N/A	#N/A			#N/A	scf7180042629605	#N/A		scf7180042629605
0	6	scf7180042629844	5852	#N/A	#N/A	#N/A			#N/A	#N/A	#N/A		scf7180042629844
0	6	scf7180042630691	12222	#N/A	#N/A	#N/A			#N/A	#N/A	#N/A		scf7180042630691
0	6	scf7180042630829	9363	#N/A	#N/A	#N/A			#N/A	#N/A	#N/A		scf7180042630829
6	0	scf7180042631830	11853	scf7180042631830	scf7180042631830	scf7180042631830			scf7180042631830	scf7180042631830	scf7180042631830		scf7180042631830
2	4	scf7180042632111	10481	#N/A	scf7180042632111	#N/A			#N/A	scf7180042632111	#N/A		scf7180042632111
0	6	scf7180042632309	11116	#N/A	#N/A	#N/A			#N/A	#N/A	#N/A		scf7180042632309
0	6	scf7180042632950	12146	#N/A	#N/A	#N/A			#N/A	#N/A	#N/A		scf7180042632950
2	4	scf7180042633570	11044	scf7180042633570	#N/A	#N/A			#N/A	#N/A	scf7180042633570		scf7180042633570
0	6	scf7180042635847	9309	#N/A	#N/A	#N/A			#N/A	#N/A	#N/A		scf7180042635847
0	6	scf7180042635980	10968	#N/A	#N/A	#N/A			#N/A	#N/A	#N/A		scf7180042635980
0	6	scf7180042636591	8331	#N/A	#N/A	#N/A			#N/A	#N/A	#N/A		scf7180042636591
0	6	scf7180042639123	7267	#N/A	#N/A	#N/A			#N/A	#N/A	#N/A		scf7180042639123
0	6	scf7180042656045	2517	#N/A	#N/A	#N/A			#N/A	#N/A	#N/A		scf7180042656045
0	6	scf7180042662591	7757	#N/A	#N/A	#N/A			#N/A	#N/A	#N/A		scf7180042662591
0	6	scf7180042663028	10748	#N/A	#N/A	#N/A			#N/A	#N/A	#N/A		scf7180042663028
0	6	scf7180042663061	9407	#N/A	#N/A	#N/A			#N/A	#N/A	#N/A		scf7180042663061
0	6	scf7180042664750	11469	#N/A	#N/A	#N/A			#N/A	#N/A	#N/A		scf7180042664750
0	6	scf7180042665498	7463	#N/A	#N/A	#N/A			#N/A	#N/A	#N/A		scf7180042665498
0	6	scf7180042665582	7895	#N/A	#N/A	#N/A			#N/A	#N/A	#N/A		scf7180042665582
0	6	scf7180042667054	8792	#N/A	#N/A	#N/A			#N/A	#N/A	#N/A		scf7180042667054
0	6	scf7180042668414	9637	#N/A	#N/A	#N/A			#N/A	#N/A	#N/A		scf7180042668414
0	6	scf7180042671123	10596	#N/A	#N/A	#N/A			#N/A	#N/A	#N/A		scf7180042671123
2	4	scf7180042677980	8087	#N/A	#N/A	scf7180042677980			#N/A	scf7180042677980	#N/A		scf7180042677980
2	4	scf7180042706431	6791	#N/A	#N/A	#N/A			scf7180042706431	scf7180042706431	#N/A		scf7180042706431
0	6	scf7180042708539	12196	#N/A	#N/A	#N/A			#N/A	#N/A	#N/A		scf7180042708539
0	6	scf7180042708734	7136	#N/A	#N/A	#N/A			#N/A	#N/A	#N/A		scf7180042708734
0	6	scf7180042708749	9305	#N/A	#N/A	#N/A			#N/A	#N/A	#N/A		scf7180042708749
0	6	scf7180042709189	8836	#N/A	#N/A	#N/A			#N/A	#N/A	#N/A		scf7180042709189
0	6	scf7180042710605	9139	#N/A	#N/A	#N/A			#N/A	#N/A	#N/A		scf7180042710605
0	6	scf7180042711299	10031	#N/A	#N/A	#N/A			#N/A	#N/A	#N/A		scf7180042711299
6	0	scf7180042714373	9428	scf7180042714373	scf7180042714373	scf7180042714373			scf7180042714373	scf7180042714373	scf7180042714373		scf7180042714373
0	6	scf7180042715277	8201	#N/A	#N/A	#N/A			#N/A	#N/A	#N/A		scf7180042715277
0	6	scf7180042716258	7860	#N/A	#N/A	#N/A			#N/A	#N/A	#N/A		scf7180042716258
0	6	scf7180042718270	6583	#N/A	#N/A	#N/A			#N/A	#N/A	#N/A		scf7180042718270
0	6	scf7180042725848	6824	#N/A	#N/A	#N/A			#N/A	#N/A	#N/A		scf7180042725848
6	0	scf7180042729835	3806	scf7180042729835	scf7180042729835	scf7180042729835			scf7180042729835	scf7180042729835	scf7180042729835		scf7180042729835
0	6	scf7180042744356	4801	#N/A	#N/A	#N/A			#N/A	#N/A	#N/A		scf7180042744356
0	6	scf7180042746965	5502	#N/A	#N/A	#N/A			#N/A	#N/A	#N/A		scf7180042746965
1	5	scf7180042755928	9998	#N/A	#N/A	#N/A			#N/A	#N/A	scf7180042755928		scf7180042755928
0	6	scf7180042757480	8535	#N/A	#N/A	#N/A			#N/A	#N/A	#N/A		scf7180042757480
0	6	scf7180042757715	9030	#N/A	#N/A	#N/A			#N/A	#N/A	#N/A		scf7180042757715
0	6	scf7180042757919	9997	#N/A	#N/A	#N/A			#N/A	#N/A	#N/A		scf7180042757919
1	5	scf7180042758546	7826	scf7180042758546	#N/A	#N/A			#N/A	#N/A	#N/A		scf7180042758546
0	6	scf7180042760092	8242	#N/A	#N/A	#N/A			#N/A	#N/A	#N/A		scf7180042760092
1	5	scf7180042762495	8657	scf7180042762495	#N/A	#N/A			#N/A	#N/A	#N/A		scf7180042762495
0	6	scf7180042764384	7505	#N/A	#N/A	#N/A			#N/A	#N/A	#N/A		scf7180042764384
0	6	scf7180042767104	7731	#N/A	#N/A	#N/A			#N/A	#N/A	#N/A		scf7180042767104
1	5	scf7180042768444	8472	#N/A	scf7180042768444	#N/A			#N/A	#N/A	#N/A		scf7180042768444
0	6	scf7180042768601	8634	#N/A	#N/A	#N/A			#N/A	#N/A	#N/A		scf7180042768601
0	6	scf7180042769982	10209	#N/A	#N/A	#N/A			#N/A	#N/A	#N/A		scf7180042769982
0	6	scf7180042771151	9159	#N/A	#N/A	#N/A			#N/A	#N/A	#N/A		scf7180042771151
0	6	scf7180042777854	8581	#N/A	#N/A	#N/A			#N/A	#N/A	#N/A		scf7180042777854
0	6	scf7180042823689	7994	#N/A	#N/A	#N/A			#N/A	#N/A	#N/A		scf7180042823689
0	6	scf7180042823950	8488	#N/A	#N/A	#N/A			#N/A	#N/A	#N/A		scf7180042823950
0	6	scf7180042823971	7722	#N/A	#N/A	#N/A			#N/A	#N/A	#N/A		scf7180042823971
0	6	scf7180042824733	7331	#N/A	#N/A	#N/A			#N/A	#N/A	#N/A		scf7180042824733
0	6	scf7180042825308	8183	#N/A	#N/A	#N/A			#N/A	#N/A	#N/A		#N/A
0	6	scf7180042825417	7989	#N/A	#N/A	#N/A			#N/A	#N/A	#N/A		scf7180042825417
0	6	scf7180042829159	9343	#N/A	#N/A	#N/A			#N/A	#N/A	#N/A		scf7180042829159
0	6	scf7180042831062	8412	#N/A	#N/A	#N/A			#N/A	#N/A	#N/A		scf7180042831062
2	4	scf7180042831791	7529	#N/A	scf7180042831791	#N/A			#N/A	#N/A	scf7180042831791		scf7180042831791
1	5	scf7180042832855	7349	#N/A	#N/A	#N/A			scf7180042832855	#N/A	#N/A		scf7180042832855
2	4	scf7180042840086	6017	#N/A	scf7180042840086	scf7180042840086			#N/A	#N/A	#N/A		scf7180042840086
0	6	scf7180042872167	2708	#N/A	#N/A	#N/A			#N/A	#N/A	#N/A		scf7180042872167
0	6	scf7180042912254	7751	#N/A	#N/A	#N/A			#N/A	#N/A	#N/A		scf7180042912254
0	6	scf7180042916884	7198	#N/A	#N/A	#N/A			#N/A	#N/A	#N/A		scf7180042916884
0	6	scf7180042916978	7804	#N/A	#N/A	#N/A			#N/A	#N/A	#N/A		scf7180042916978
1	5	scf7180042917833	8250	#N/A	#N/A	#N/A			#N/A	scf7180042917833	#N/A		scf7180042917833
0	6	scf7180042922711	5878	#N/A	#N/A	#N/A			#N/A	#N/A	#N/A		#N/A
0	6	scf7180042924038	8502	#N/A	#N/A	#N/A			#N/A	#N/A	#N/A		scf7180042924038
3	3	scf7180042924497	6306	scf7180042924497	#N/A	#N/A			#N/A	scf7180042924497	scf7180042924497		scf7180042924497
2	4	scf7180042924765	6395	scf7180042924765	#N/A	#N/A			#N/A	#N/A	scf7180042924765		scf7180042924765
0	6	scf7180042924824	6448	#N/A	#N/A	#N/A			#N/A	#N/A	#N/A		scf7180042924824
1	5	scf7180042938275	8516	scf7180042938275	#N/A	#N/A			#N/A	#N/A	#N/A		scf7180042938275
0	6	scf7180042948702	6235	#N/A	#N/A	#N/A			#N/A	#N/A	#N/A		scf7180042948702
2	4	scf7180043029263	6029	scf7180043029263	#N/A	#N/A			#N/A	#N/A	scf7180043029263		scf7180043029263
0	6	scf7180043029339	6311	#N/A	#N/A	#N/A			#N/A	#N/A	#N/A		scf7180043029339
0	6	scf7180043029755	5139	#N/A	#N/A	#N/A			#N/A	#N/A	#N/A		scf7180043029755
1	5	scf7180043030721	4981	#N/A	#N/A	#N/A			scf7180043030721	#N/A	#N/A		scf7180043030721
0	6	scf7180043032276	6535	#N/A	#N/A	#N/A			#N/A	#N/A	#N/A		scf7180043032276
0	6	scf7180043032290	7157	#N/A	#N/A	#N/A			#N/A	#N/A	#N/A		scf7180043032290
0	6	scf7180043035945	5692	#N/A	#N/A	#N/A			#N/A	#N/A	#N/A		scf7180043035945
0	6	scf7180043037960	8104	#N/A	#N/A	#N/A			#N/A	#N/A	#N/A		scf7180043037960
2	4	scf7180043041251	7850	scf7180043041251	#N/A	#N/A			#N/A	#N/A	scf7180043041251		scf7180043041251
0	6	scf7180043042546	8268	#N/A	#N/A	#N/A			#N/A	#N/A	#N/A		scf7180043042546
1	5	scf7180043043522	6979	#N/A	#N/A	#N/A			#N/A	#N/A	scf7180043043522		scf7180043043522
0	6	scf7180043046599	6963	#N/A	#N/A	#N/A			#N/A	#N/A	#N/A		scf7180043046599
0	6	scf7180043053925	6208	#N/A	#N/A	#N/A			#N/A	#N/A	#N/A		scf7180043053925
0	6	scf7180043066319	4471	#N/A	#N/A	#N/A			#N/A	#N/A	#N/A		scf7180043066319
6	0	scf7180043185088	6768	scf7180043185088	scf7180043185088	scf7180043185088			scf7180043185088	scf7180043185088	scf7180043185088		scf7180043185088
0	6	scf7180043186853	7278	#N/A	#N/A	#N/A			#N/A	#N/A	#N/A		scf7180043186853
0	6	scf7180043186960	7256	#N/A	#N/A	#N/A			#N/A	#N/A	#N/A		scf7180043186960
0	6	scf7180043187022	9209	#N/A	#N/A	#N/A			#N/A	#N/A	#N/A		scf7180043187022
0	6	scf7180043190005	6247	#N/A	#N/A	#N/A			#N/A	#N/A	#N/A		scf7180043190005
0	6	scf7180043193212	7135	#N/A	#N/A	#N/A			#N/A	#N/A	#N/A		#N/A
0	6	scf7180043193983	5799	#N/A	#N/A	#N/A			#N/A	#N/A	#N/A		scf7180043193983
3	3	scf7180043194621	6433	scf7180043194621	scf7180043194621	scf7180043194621			#N/A	#N/A	#N/A		scf7180043194621
0	6	scf7180043195577	6420	#N/A	#N/A	#N/A			#N/A	#N/A	#N/A		scf7180043195577
0	6	scf7180043195770	7495	#N/A	#N/A	#N/A			#N/A	#N/A	#N/A		scf7180043195770
0	6	scf7180043195831	5557	#N/A	#N/A	#N/A			#N/A	#N/A	#N/A		scf7180043195831
0	6	scf7180043200836	6605	#N/A	#N/A	#N/A			#N/A	#N/A	#N/A		#N/A
0	6	scf7180043204792	6038	#N/A	#N/A	#N/A			#N/A	#N/A	#N/A		scf7180043204792
0	6	scf7180043214795	4854	#N/A	#N/A	#N/A			#N/A	#N/A	#N/A		scf7180043214795
1	5	scf7180043215550	5546	#N/A	#N/A	scf7180043215550			#N/A	#N/A	#N/A		scf7180043215550
2	4	scf7180043220922	4497	scf7180043220922	#N/A	#N/A			scf7180043220922	#N/A	#N/A		scf7180043220922
0	6	scf7180043224615	4917	#N/A	#N/A	#N/A			#N/A	#N/A	#N/A		scf7180043224615
4	2	scf7180043224623	7238	scf7180043224623	#N/A	scf7180043224623			#N/A	scf7180043224623	scf7180043224623		scf7180043224623
0	6	scf7180043233431	5006	#N/A	#N/A	#N/A			#N/A	#N/A	#N/A		scf7180043233431
6	0	scf7180043292122	1344	scf7180043292122	scf7180043292122	scf7180043292122			scf7180043292122	scf7180043292122	scf7180043292122		scf7180043292122
2	4	scf7180043393767	6676	scf7180043393767	#N/A	#N/A			#N/A	scf7180043393767	#N/A		scf7180043393767
0	6	scf7180043393826	5967	#N/A	#N/A	#N/A			#N/A	#N/A	#N/A		scf7180043393826
1	5	scf7180043396159	5133	#N/A	#N/A	#N/A			#N/A	scf7180043396159	#N/A		scf7180043396159
0	6	scf7180043398586	5175	#N/A	#N/A	#N/A			#N/A	#N/A	#N/A		scf7180043398586
3	3	scf7180043400835	5268	scf7180043400835	#N/A	#N/A			#N/A	scf7180043400835	scf7180043400835		scf7180043400835
0	6	scf7180043402540	5561	#N/A	#N/A	#N/A			#N/A	#N/A	#N/A		scf7180043402540
0	6	scf7180043402632	6405	#N/A	#N/A	#N/A			#N/A	#N/A	#N/A		scf7180043402632
0	6	scf7180043407190	6815	#N/A	#N/A	#N/A			#N/A	#N/A	#N/A		scf7180043407190
0	6	scf7180043410333	5082	#N/A	#N/A	#N/A			#N/A	#N/A	#N/A		scf7180043410333
0	6	scf7180043410762	5840	#N/A	#N/A	#N/A			#N/A	#N/A	#N/A		scf7180043410762
0	6	scf7180043411356	4139	#N/A	#N/A	#N/A			#N/A	#N/A	#N/A		scf7180043411356
0	6	scf7180043413238	6383	#N/A	#N/A	#N/A			#N/A	#N/A	#N/A		scf7180043413238
0	6	scf7180043414473	6569	#N/A	#N/A	#N/A			#N/A	#N/A	#N/A		scf7180043414473
0	6	scf7180043418305	4193	#N/A	#N/A	#N/A			#N/A	#N/A	#N/A		scf7180043418305
0	6	scf7180043418796	6582	#N/A	#N/A	#N/A			#N/A	#N/A	#N/A		scf7180043418796
0	6	scf7180043419505	6719	#N/A	#N/A	#N/A			#N/A	#N/A	#N/A		scf7180043419505
1	5	scf7180043419768	4430	#N/A	#N/A	#N/A			#N/A	#N/A	scf7180043419768		scf7180043419768
0	6	scf7180043433398	5686	#N/A	#N/A	#N/A			#N/A	#N/A	#N/A		scf7180043433398
0	6	scf7180043437329	6333	#N/A	#N/A	#N/A			#N/A	#N/A	#N/A		scf7180043437329
0	6	scf7180043455988	4184	#N/A	#N/A	#N/A			#N/A	#N/A	#N/A		scf7180043455988
6	0	scf7180043502554	2159	scf7180043502554	scf7180043502554	scf7180043502554			scf7180043502554	scf7180043502554	scf7180043502554		scf7180043502554
0	6	scf7180043684590	6643	#N/A	#N/A	#N/A			#N/A	#N/A	#N/A		scf7180043684590
0	6	scf7180043684748	4324	#N/A	#N/A	#N/A			#N/A	#N/A	#N/A		scf7180043684748
6	0	scf7180043684923	5258	scf7180043684923	scf7180043684923	scf7180043684923			scf7180043684923	scf7180043684923	scf7180043684923		scf7180043684923
0	6	scf7180043686295	4774	#N/A	#N/A	#N/A			#N/A	#N/A	#N/A		scf7180043686295
0	6	scf7180043686317	6630	#N/A	#N/A	#N/A			#N/A	#N/A	#N/A		scf7180043686317
0	6	scf7180043689942	5323	#N/A	#N/A	#N/A			#N/A	#N/A	#N/A		scf7180043689942
6	0	scf7180043690598	7311	scf7180043690598	scf7180043690598	scf7180043690598			scf7180043690598	scf7180043690598	scf7180043690598		scf7180043690598
0	6	scf7180043691495	5900	#N/A	#N/A	#N/A			#N/A	#N/A	#N/A		scf7180043691495
0	6	scf7180043698668	7148	#N/A	#N/A	#N/A			#N/A	#N/A	#N/A		scf7180043698668
0	6	scf7180043700957	6774	#N/A	#N/A	#N/A			#N/A	#N/A	#N/A		scf7180043700957
0	6	scf7180043701517	4150	#N/A	#N/A	#N/A			#N/A	#N/A	#N/A		scf7180043701517
3	3	scf7180043701805	5514	scf7180043701805	#N/A	#N/A			scf7180043701805	scf7180043701805	#N/A		scf7180043701805
0	6	scf7180043706770	6100	#N/A	#N/A	#N/A			#N/A	#N/A	#N/A		scf7180043706770
0	6	scf7180043707007	4719	#N/A	#N/A	#N/A			#N/A	#N/A	#N/A		scf7180043707007
0	6	scf7180043711146	5017	#N/A	#N/A	#N/A			#N/A	#N/A	#N/A		scf7180043711146
6	0	scf7180043713012	5015	scf7180043713012	scf7180043713012	scf7180043713012			scf7180043713012	scf7180043713012	scf7180043713012		scf7180043713012
0	6	scf7180043718731	5027	#N/A	#N/A	#N/A			#N/A	#N/A	#N/A		scf7180043718731
0	6	scf7180043720146	7121	#N/A	#N/A	#N/A			#N/A	#N/A	#N/A		scf7180043720146
0	6	scf7180043723986	6787	#N/A	#N/A	#N/A			#N/A	#N/A	#N/A		scf7180043723986
0	6	scf7180043727006	5785	#N/A	#N/A	#N/A			#N/A	#N/A	#N/A		scf7180043727006
1	5	scf7180043734481	6555	#N/A	scf7180043734481	#N/A			#N/A	#N/A	#N/A		scf7180043734481
0	6	scf7180043734758	4856	#N/A	#N/A	#N/A			#N/A	#N/A	#N/A		scf7180043734758
1	5	scf7180043740125	5039	#N/A	#N/A	scf7180043740125			#N/A	#N/A	#N/A		scf7180043740125
0	6	scf7180043753399	3020	#N/A	#N/A	#N/A			#N/A	#N/A	#N/A		scf7180043753399
0	6	scf7180043769752	3660	#N/A	#N/A	#N/A			#N/A	#N/A	#N/A		scf7180043769752
6	0	scf7180043776891	4722	scf7180043776891	scf7180043776891	scf7180043776891			scf7180043776891	scf7180043776891	scf7180043776891		scf7180043776891
0	6	scf7180043780866	2559	#N/A	#N/A	#N/A			#N/A	#N/A	#N/A		scf7180043780866
6	0	scf7180043803264	2122	scf7180043803264	scf7180043803264	scf7180043803264			scf7180043803264	scf7180043803264	scf7180043803264		scf7180043803264
6	0	scf7180043863741	1573	scf7180043863741	scf7180043863741	scf7180043863741			scf7180043863741	scf7180043863741	scf7180043863741		scf7180043863741
6	0	scf7180043878497	1679	scf7180043878497	scf7180043878497	scf7180043878497			scf7180043878497	scf7180043878497	scf7180043878497		scf7180043878497
0	6	scf7180044096800	4840	#N/A	#N/A	#N/A			#N/A	#N/A	#N/A		scf7180044096800
0	6	scf7180044097927	5791	#N/A	#N/A	#N/A			#N/A	#N/A	#N/A		scf7180044097927
0	6	scf7180044106219	5074	#N/A	#N/A	#N/A			#N/A	#N/A	#N/A		scf7180044106219
0	6	scf7180044111275	4981	#N/A	#N/A	#N/A			#N/A	#N/A	#N/A		scf7180044111275
1	5	scf7180044111461	5345	#N/A	#N/A	scf7180044111461			#N/A	#N/A	#N/A		scf7180044111461
0	6	scf7180044113177	4149	#N/A	#N/A	#N/A			#N/A	#N/A	#N/A		scf7180044113177
0	6	scf7180044113597	5705	#N/A	#N/A	#N/A			#N/A	#N/A	#N/A		scf7180044113597
1	5	scf7180044114482	4503	#N/A	#N/A	#N/A			#N/A	#N/A	scf7180044114482		scf7180044114482
0	6	scf7180044114951	4819	#N/A	#N/A	#N/A			#N/A	#N/A	#N/A		scf7180044114951
0	6	scf7180044120414	5695	#N/A	#N/A	#N/A			#N/A	#N/A	#N/A		scf7180044120414
0	6	scf7180044123199	4424	#N/A	#N/A	#N/A			#N/A	#N/A	#N/A		scf7180044123199
0	6	scf7180044128050	4908	#N/A	#N/A	#N/A			#N/A	#N/A	#N/A		scf7180044128050
0	6	scf7180044133456	6373	#N/A	#N/A	#N/A			#N/A	#N/A	#N/A		scf7180044133456
6	0	scf7180044134534	4060	scf7180044134534	scf7180044134534	scf7180044134534			scf7180044134534	scf7180044134534	scf7180044134534		scf7180044134534
0	6	scf7180044134535	5066	#N/A	#N/A	#N/A			#N/A	#N/A	#N/A		scf7180044134535
0	6	scf7180044138066	5105	#N/A	#N/A	#N/A			#N/A	#N/A	#N/A		scf7180044138066
0	6	scf7180044155553	3949	#N/A	#N/A	#N/A			#N/A	#N/A	#N/A		scf7180044155553
6	0	scf7180044209722	3698	scf7180044209722	scf7180044209722	scf7180044209722			scf7180044209722	scf7180044209722	scf7180044209722		scf7180044209722
0	6	scf7180044236102	2551	#N/A	#N/A	#N/A			#N/A	#N/A	#N/A		scf7180044236102
0	6	scf7180044680283	3524	#N/A	#N/A	#N/A			#N/A	#N/A	#N/A		scf7180044680283
0	6	scf7180044682364	4191	#N/A	#N/A	#N/A			#N/A	#N/A	#N/A		scf7180044682364
0	6	scf7180044684081	4510	#N/A	#N/A	#N/A			#N/A	#N/A	#N/A		scf7180044684081
0	6	scf7180044684847	5640	#N/A	#N/A	#N/A			#N/A	#N/A	#N/A		scf7180044684847
1	5	scf7180044686304	4517	#N/A	scf7180044686304	#N/A			#N/A	#N/A	#N/A		scf7180044686304
0	6	scf7180044689982	2540	#N/A	#N/A	#N/A			#N/A	#N/A	#N/A		scf7180044689982
0	6	scf7180044690651	4461	#N/A	#N/A	#N/A			#N/A	#N/A	#N/A		scf7180044690651
0	6	scf7180044690912	3317	#N/A	#N/A	#N/A			#N/A	#N/A	#N/A		scf7180044690912
0	6	scf7180044691729	4058	#N/A	#N/A	#N/A			#N/A	#N/A	#N/A		scf7180044691729
1	5	scf7180044697643	5154	#N/A	#N/A	#N/A			scf7180044697643	#N/A	#N/A		scf7180044697643
0	6	scf7180044703488	4553	#N/A	#N/A	#N/A			#N/A	#N/A	#N/A		scf7180044703488
0	6	scf7180044707871	4389	#N/A	#N/A	#N/A			#N/A	#N/A	#N/A		scf7180044707871
6	0	scf7180044735823	2719	scf7180044735823	scf7180044735823	scf7180044735823			scf7180044735823	scf7180044735823	scf7180044735823		scf7180044735823
0	6	scf7180044737013	3661	#N/A	#N/A	#N/A			#N/A	#N/A	#N/A		scf7180044737013
0	6	scf7180044744262	4287	#N/A	#N/A	#N/A			#N/A	#N/A	#N/A		scf7180044744262
0	6	scf7180044745789	4725	#N/A	#N/A	#N/A			#N/A	#N/A	#N/A		scf7180044745789
0	6	scf7180044746433	2840	#N/A	#N/A	#N/A			#N/A	#N/A	#N/A		scf7180044746433
1	5	scf7180044769026	3244	#N/A	scf7180044769026	#N/A			#N/A	#N/A	#N/A		scf7180044769026
0	6	scf7180044771821	2981	#N/A	#N/A	#N/A			#N/A	#N/A	#N/A		scf7180044771821
0	6	scf7180044773788	2990	#N/A	#N/A	#N/A			#N/A	#N/A	#N/A		scf7180044773788
0	6	scf7180044774118	3756	#N/A	#N/A	#N/A			#N/A	#N/A	#N/A		scf7180044774118
3	3	scf7180044898120	1248	#N/A	#N/A	scf7180044898120			scf7180044898120	#N/A	scf7180044898120		scf7180044898120
6	0	scf7180044912620	1311	scf7180044912620	scf7180044912620	scf7180044912620			scf7180044912620	scf7180044912620	scf7180044912620		scf7180044912620
6	0	scf7180044943173	1291	scf7180044943173	scf7180044943173	scf7180044943173			scf7180044943173	scf7180044943173	scf7180044943173		scf7180044943173
6	0	scf7180044966580	1858	scf7180044966580	scf7180044966580	scf7180044966580			scf7180044966580	scf7180044966580	scf7180044966580		scf7180044966580
5	1	scf7180045050770	846	scf7180045050770	scf7180045050770	scf7180045050770			scf7180045050770	scf7180045050770	#N/A		scf7180045050770
1	5	scf7180045527545	3143	scf7180045527545	#N/A	#N/A			#N/A	#N/A	#N/A		scf7180045527545
0	6	scf7180045529631	4184	#N/A	#N/A	#N/A			#N/A	#N/A	#N/A		scf7180045529631
0	6	scf7180045531272	3844	#N/A	#N/A	#N/A			#N/A	#N/A	#N/A		scf7180045531272
0	6	scf7180045532710	5364	#N/A	#N/A	#N/A			#N/A	#N/A	#N/A		scf7180045532710
0	6	scf7180045533954	3187	#N/A	#N/A	#N/A			#N/A	#N/A	#N/A		scf7180045533954
0	6	scf7180045534012	3295	#N/A	#N/A	#N/A			#N/A	#N/A	#N/A		scf7180045534012
0	6	scf7180045538187	4318	#N/A	#N/A	#N/A			#N/A	#N/A	#N/A		scf7180045538187
0	6	scf7180045538898	3561	#N/A	#N/A	#N/A			#N/A	#N/A	#N/A		scf7180045538898
0	6	scf7180045547170	3289	#N/A	#N/A	#N/A			#N/A	#N/A	#N/A		scf7180045547170
0	6	scf7180045548507	4188	#N/A	#N/A	#N/A			#N/A	#N/A	#N/A		scf7180045548507
0	6	scf7180045564805	4618	#N/A	#N/A	#N/A			#N/A	#N/A	#N/A		scf7180045564805
0	6	scf7180045565985	5042	#N/A	#N/A	#N/A			#N/A	#N/A	#N/A		scf7180045565985
0	6	scf7180045580271	3324	#N/A	#N/A	#N/A			#N/A	#N/A	#N/A		scf7180045580271
0	6	scf7180045587131	3663	#N/A	#N/A	#N/A			#N/A	#N/A	#N/A		scf7180045587131
0	6	scf7180045590894	4338	#N/A	#N/A	#N/A			#N/A	#N/A	#N/A		scf7180045590894
0	6	scf7180045592182	4026	#N/A	#N/A	#N/A			#N/A	#N/A	#N/A		scf7180045592182
0	6	scf7180045620138	2438	#N/A	#N/A	#N/A			#N/A	#N/A	#N/A		scf7180045620138
0	6	scf7180045628270	3353	#N/A	#N/A	#N/A			#N/A	#N/A	#N/A		scf7180045628270
0	6	scf7180045629759	2761	#N/A	#N/A	#N/A			#N/A	#N/A	#N/A		scf7180045629759
6	0	scf7180046302773	808	scf7180046302773	scf7180046302773	scf7180046302773			scf7180046302773	scf7180046302773	scf7180046302773		scf7180046302773
5	1	scf7180046388415	508	scf7180046388415	scf7180046388415	scf7180046388415			scf7180046388415	scf7180046388415	#N/A		scf7180046388415
0	6	scf7180046728187	3332	#N/A	#N/A	#N/A			#N/A	#N/A	#N/A		scf7180046728187
0	6	scf7180046730009	3948	#N/A	#N/A	#N/A			#N/A	#N/A	#N/A		scf7180046730009
0	6	scf7180046730348	2938	#N/A	#N/A	#N/A			#N/A	#N/A	#N/A		scf7180046730348
1	5	scf7180046752351	3222	scf7180046752351	#N/A	#N/A			#N/A	#N/A	#N/A		scf7180046752351
1	5	scf7180046753180	2967	scf7180046753180	#N/A	#N/A			#N/A	#N/A	#N/A		scf7180046753180
0	6	scf7180046756028	2910	#N/A	#N/A	#N/A			#N/A	#N/A	#N/A		scf7180046756028
0	6	scf7180046770881	4461	#N/A	#N/A	#N/A			#N/A	#N/A	#N/A		scf7180046770881
1	5	scf7180046785064	3634	#N/A	scf7180046785064	#N/A			#N/A	#N/A	#N/A		scf7180046785064
0	6	scf7180046793872	2369	#N/A	#N/A	#N/A			#N/A	#N/A	#N/A		scf7180046793872
6	0	scf7180046812034	2889	scf7180046812034	scf7180046812034	scf7180046812034			scf7180046812034	scf7180046812034	scf7180046812034		scf7180046812034
0	6	scf7180046813258	2477	#N/A	#N/A	#N/A			#N/A	#N/A	#N/A		scf7180046813258
0	6	scf7180046816278	3437	#N/A	#N/A	#N/A			#N/A	#N/A	#N/A		scf7180046816278
0	6	scf7180046825955	2746	#N/A	#N/A	#N/A			#N/A	#N/A	#N/A		scf7180046825955
0	6	scf7180046855562	2458	#N/A	#N/A	#N/A			#N/A	#N/A	#N/A		scf7180046855562
6	0	scf7180046952905	1559	scf7180046952905	scf7180046952905	scf7180046952905			scf7180046952905	scf7180046952905	scf7180046952905		scf7180046952905
6	0	scf7180047160251	1239	scf7180047160251	scf7180047160251	scf7180047160251			scf7180047160251	scf7180047160251	scf7180047160251		scf7180047160251
0	6	scf7180048403789	2220	#N/A	#N/A	#N/A			#N/A	#N/A	#N/A		scf7180048403789
0	6	scf7180048417602	2659	#N/A	#N/A	#N/A			#N/A	#N/A	#N/A		scf7180048417602
0	6	scf7180048437854	3101	#N/A	#N/A	#N/A			#N/A	#N/A	#N/A		scf7180048437854
0	6	scf7180048439906	2448	#N/A	#N/A	#N/A			#N/A	#N/A	#N/A		scf7180048439906
0	6	scf7180048440485	3532	#N/A	#N/A	#N/A			#N/A	#N/A	#N/A		scf7180048440485
0	6	scf7180048444103	2817	#N/A	#N/A	#N/A			#N/A	#N/A	#N/A		scf7180048444103
0	6	scf7180048456905	2854	#N/A	#N/A	#N/A			#N/A	#N/A	#N/A		scf7180048456905
0	6	scf7180048460522	3092	#N/A	#N/A	#N/A			#N/A	#N/A	#N/A		scf7180048460522
0	6	scf7180048464245	3166	#N/A	#N/A	#N/A			#N/A	#N/A	#N/A		scf7180048464245
1	5	scf7180048469075	2580	#N/A	#N/A	#N/A			#N/A	scf7180048469075	#N/A		scf7180048469075
0	6	scf7180048477801	2699	#N/A	#N/A	#N/A			#N/A	#N/A	#N/A		scf7180048477801
3	3	scf7180048496221	2537	scf7180048496221	scf7180048496221	#N/A			#N/A	#N/A	scf7180048496221		scf7180048496221
0	6	scf7180048509330	2720	#N/A	#N/A	#N/A			#N/A	#N/A	#N/A		scf7180048509330
0	6	scf7180048515927	1838	#N/A	#N/A	#N/A			#N/A	#N/A	#N/A		scf7180048515927
6	0	scf7180048697209	1334	scf7180048697209	scf7180048697209	scf7180048697209			scf7180048697209	scf7180048697209	scf7180048697209		scf7180048697209
5	1	scf7180048744466	777	scf7180048744466	scf7180048744466	scf7180048744466			scf7180048744466	scf7180048744466	#N/A		scf7180048744466
6	0	scf7180050625254	2139	scf7180050625254	scf7180050625254	scf7180050625254			scf7180050625254	scf7180050625254	scf7180050625254		scf7180050625254
1	5	scf7180050630530	2060	scf7180050630530	#N/A	#N/A			#N/A	#N/A	#N/A		scf7180050630530
1	5	scf7180050632747	2278	#N/A	#N/A	#N/A			scf7180050632747	#N/A	#N/A		scf7180050632747
4	2	scf7180050656228	1155	scf7180050656228	scf7180050656228	#N/A			scf7180050656228	#N/A	scf7180050656228		scf7180050656228
6	0	scf7180050738316	396	scf7180050738316	scf7180050738316	scf7180050738316			scf7180050738316	scf7180050738316	scf7180050738316		scf7180050738316
6	0	scf7180050890014	1729	scf7180050890014	scf7180050890014	scf7180050890014			scf7180050890014	scf7180050890014	scf7180050890014		scf7180050890014
1	5	scf7180051018318	2801	#N/A	#N/A	#N/A			#N/A	#N/A	scf7180051018318		scf7180051018318
0	245
1	34
2	16
3	9
4	2
0	30
1	3
2	2
3	9
4	16

## Sheet: Sheet2
1000g				1000g (no degenerate ctgs)			Acepa2.0
nr. Occur	freq			nr. Occur	freq		nr. Occur	freq
1	1978240			1	1833456		1	3242908
2	367681			2	328994		2	797475
3	119344			3	103771		3	304158
4	55167			4	47212		4	144323
5	32124			5	27408		5	79210
6	21350			6	18166		6	49231
7	14639			7	12437		7	32860
8	11249			8	9475		8	23029
9	8685			9	7309		9	17170
10	6860			10	5720		10	13396
11	5570			11	4693		11	10667
12	4605			12	3829		12	8878
13	3899			13	3270		13	7263
14	3466			14	2860		14	6255
15	2796			15	2288		15	5345
16	2574			16	2143		16	4659
17	2161			17	1777		17	4173
18	1950			18	1589		18	3735
19	1726			19	1410		19	3219
20	1547			20	1283		20	2945
21	1421			21	1185		21	2595
22	1309			22	1057		22	2363
23	1124			23	900		23	2176
24	1130			24	909		24	2037
25	960			25	773		25	1831
26	879			26	704		26	1634
27	750			27	598		27	1527
28	804			28	638		28	1380
29	686			29	533		29	1318
30	685			30	525		30	1194
31	599			31	489		31	1151
32	563			32	448		32	1106
33	566			33	451		33	1024
34	493			34	388		34	925
35	471			35	362		35	907
36	444			36	341		36	772
37	405			37	316		37	807
38	432			38	341		38	726
39	388			39	304		39	671
40	366			40	279		40	691
41	356			41	278		41	590
42	335			42	251		42	593
43	312			43	231		43	582
44	268			44	212		44	542
45	301			45	231		45	524
46	301			46	228		46	505
47	250			47	189		47	495
48	217			48	162		48	407
49	209			49	154		49	413
50	227			50	162		50	402
51	200			51	137		51	367
52	227			52	175		52	384
53	201			53	149		53	355
54	193			54	147		54	342
55	203			55	153		55	322
56	179			56	147		56	304
57	144			57	105		57	289
58	172			58	129		58	267
59	162			59	122		59	283
60	167			60	116		60	264
61	151			61	113		61	262
62	146			62	99		62	236
63	124			63	92		63	220
64	150			64	104		64	254
65	112			65	80		65	229
66	116			66	89		66	221
67	125			67	91		67	217
68	125			68	91		68	188
69	100			69	70		69	174
70	123			70	96		70	200
71	95			71	73		71	178
72	102			72	76		72	191
73	121			73	94		73	183
74	78			74	60		74	166
75	95			75	64		75	150
76	90			76	65		76	157
77	92			77	65		77	157
78	100			78	74		78	150
79	84			79	58		79	135
80	86			80	62		80	136
81	83			81	58		81	137
82	85			82	66		82	140
83	79			83	58		83	138
84	64			84	50		84	114
85	66			85	43		85	126
86	85			86	56		86	126
87	74			87	48		87	116
88	66			88	46		88	115
89	61			89	45		89	111
90	67			90	51		90	86
91	63			91	47		91	113
92	71			92	49		92	102
93	61			93	44		93	95
94	58			94	34		94	88
95	58			95	40		95	93
96	58			96	36		96	94
97	72			97	56		97	90
98	63			98	47		98	75
99	45			99	28		99	91
100	57			100	47		100	74
101	61			101	43		101	70
102	54			102	39		102	82
103	41			103	25		103	60
104	45			104	31		104	84
105	50			105	38		105	56
106	42			106	26		106	75
107	37			107	26		107	72
108	43			108	31		108	83
109	39			109	26		109	66
110	36			110	20		110	53
111	41			111	34		111	54
112	43			112	27		112	61
113	42			113	28		113	69
114	45			114	37		114	56
115	41			115	32		115	63
116	40			116	27		116	59
117	43			117	26		117	53
118	29			118	19		118	63
119	37			119	25		119	69
120	47			120	33		120	70
121	37			121	24		121	49
122	45			122	32		122	57
123	40			123	26		123	52
124	35			124	26		124	44
125	38			125	26		125	47
126	28			126	21		126	52
127	32			127	23		127	40
128	26			128	15		128	47
129	25			129	18		129	44
130	40			130	27		130	43
131	30			131	24		131	36
132	26			132	17		132	45
133	28			133	18		133	40
134	38			134	25		134	49
135	40			135	29		135	47
136	29			136	17		136	36
137	46			137	28		137	40
138	22			138	19		138	32
139	24			139	12		139	39
140	26			140	17		140	37
141	32			141	22		141	37
142	38			142	25		142	32
143	26			143	20		143	33
144	25			144	14		144	29
145	24			145	14		145	35
146	28			146	18		146	30
147	27			147	18		147	31
148	34			148	22		148	22
149	24			149	10		149	30
150	28			150	20		150	34
151	29			151	18		151	32
152	19			152	15		152	29
153	11			153	10		153	31
154	23			154	18		154	32
155	19			155	14		155	37
156	35			156	17		156	30
157	28			157	14		157	36
158	20			158	14		158	26
159	23			159	16		159	27
160	24			160	16		160	22
161	22			161	14		161	26
162	24			162	16		162	35
163	20			163	13		163	28
164	19			164	11		164	27
165	20			165	16		165	31
166	24			166	13		166	34
167	16			167	13		167	30
168	11			168	8		168	24
169	27			169	16		169	25
170	15			170	9		170	23
171	16			171	11		171	23
172	16			172	11		172	21
173	19			173	16		173	29
174	18			174	12		174	28
175	17			175	7		175	17
176	14			176	6		176	12
177	13			177	8		177	19
178	9			178	5		178	16
179	23			179	19		179	21
180	18			180	12		180	15
181	16			181	7		181	16
182	10			182	5		182	14
183	19			183	10		183	19
184	19			184	13		184	11
185	21			185	17		185	22
186	14			186	12		186	21
187	13			187	8		187	19
188	18			188	12		188	9
189	19			189	13		189	21
190	13			190	7		190	25
191	15			191	10		191	14
192	13			192	10		192	12
193	9			193	3		193	15
194	13			194	8		194	22
195	18			195	9		195	21
196	18			196	12		196	16
197	15			197	8		197	19
198	8			198	6		198	16
199	7			199	5		199	11
200	16			200	9		200	16
201	14			201	7		201	19
202	8			202	6		202	16
203	14			203	8		203	9
204	6			204	5		204	14
205	11			205	6		205	18
206	12			206	7		206	10
207	17			207	12		207	17
208	11			208	6		208	17
209	11			209	5		209	9
210	13			210	5		210	15
211	8			211	7		211	13
212	11			212	7		212	7
213	10			213	8		213	15
214	10			214	4		214	13
215	13			215	9		215	11
216	13			216	8		216	15
217	17			217	10		217	16
218	18			218	14		218	16
219	11			219	8		219	7
220	9			220	2		220	12
221	20			221	13		221	15
222	12			222	9		222	13
223	13			223	8		223	11
224	8			224	7		224	6
225	9			225	6		225	10
226	10			226	7		226	9
227	14			227	9		227	12
228	12			228	10		228	6
229	11			229	8		229	9
230	10			230	5		230	7
231	5			231	3		231	7
232	9			232	4		232	8
233	7			233	4		233	7
234	10			234	4		234	11
235	10			235	7		235	10
236	7			236	5		236	10
237	7			237	3		237	8
238	10			238	8		238	7
239	11			239	7		239	9
240	11			240	5		240	7
241	9			241	8		241	9
242	6			242	4		242	4
243	8			243	4		243	9
244	8			244	4		244	9
245	4			245	2		245	5
246	7			246	7		246	5
247	7			247	4		247	10
248	11			248	9		248	8
249	4			249	3		249	7
250	8			250	5		250	18
251	7			251	6		251	8
252	11			252	6		252	7
253	9			253	6		253	8
254	8			254	4		254	10
255	8			255	5		255	6
256	7			256	4		256	10
257	7			257	6		257	6
258	10			258	6		258	4
259	9			259	6		259	10
260	5			260	3		260	7
261	7			261	5		261	9
262	9			262	6		262	6
263	9			263	5		263	6
264	7			264	2		264	5
265	6			265	5		265	14
266	6			266	2		266	11
267	9			267	6		267	6
268	6			268	4		268	7
269	6			269	3		269	9
270	7			270	5		270	6
271	8			271	5		271	7
272	6			272	3		272	11
273	3			273	1		273	3
274	4			274	2		274	10
275	3			275	2		275	3
276	3			276	2		276	5
277	5			277	4		277	7
278	6			278	4		278	7
279	8			279	3		279	6
280	4			280	3		280	5
281	4			281	4		281	5
282	6			282	4		282	2
283	4			283	3		283	4
284	4			284	2		284	7
285	3			285	1		285	6
286	7			286	6		286	4
287	7			287	4		287	4
288	5			288	3		288	5
289	12			289	7		289	2
290	5			290	3		290	2
291	7			291	6		291	7
292	5			292	5		292	8
293	4			293	3		293	3
294	7			294	2		294	5
295	4			295	3		295	4
296	1			297	6		296	5
297	8			298	4		297	6
298	6			299	5		298	5
299	6			300	7		299	4
300	12			301	3		300	10
301	3			302	8		301	4
302	11			303	3		302	3
303	7			304	3		303	3
304	8			305	2		304	3
305	5			306	3		305	6
306	5			307	6		306	5
307	10			308	6		307	4
308	8			309	1		308	2
309	2			310	3		309	4
310	5			311	2		310	8
311	4			312	2		311	7
312	4			313	5		312	3
313	9			314	2		313	1
314	5			316	1		314	1
315	2			317	4		315	4
316	1			318	2		316	5
317	5			320	4		317	3
318	3			321	1		318	5
320	7			322	3		319	4
321	3			323	2		320	1
322	6			324	2		321	3
323	4			326	2		322	3
324	5			327	3		323	2
325	1			328	1		324	3
326	3			329	1		325	3
327	4			330	1		326	2
328	4			331	1		327	1
329	3			332	4		328	4
330	2			333	2		329	9
331	1			334	6		330	4
332	6			335	2		331	6
333	4			336	1		332	6
334	8			337	2		333	2
335	3			338	2		334	1
336	1			339	2		335	3
337	3			340	3		336	5
338	5			341	5		337	2
339	4			342	3		338	7
340	3			343	1		339	5
341	7			344	5		340	1
342	6			345	3		341	7
343	3			346	4		342	2
344	6			348	2		343	7
345	5			349	2		344	3
346	7			351	3		345	6
347	2			352	3		346	2
348	4			353	2		347	2
349	2			354	1		348	2
351	3			355	2		350	3
352	4			356	2		351	2
353	4			357	1		353	3
354	5			358	4		354	4
355	2			359	2		355	4
356	3			361	1		356	2
357	2			362	1		357	6
358	6			364	1		358	2
359	2			366	3		359	1
360	2			367	2		360	3
361	2			368	1		361	6
362	2			370	2		363	2
364	1			371	1		364	3
365	2			372	2		365	2
366	3			374	1		366	3
367	3			375	1		367	4
368	2			377	1		368	2
369	3			378	1		369	5
370	3			379	2		371	2
371	2			380	2		372	3
372	3			382	3		373	4
373	2			383	1		374	3
374	2			384	1		375	2
375	2			385	5		376	2
376	1			386	2		377	2
377	2			387	2		378	1
378	3			388	2		379	2
379	3			389	3		380	2
380	4			390	2		381	2
382	4			391	2		382	2
383	1			392	2		383	1
384	3			393	3		384	2
385	5			394	5		385	3
386	3			395	2		386	2
387	3			396	1		387	2
388	2			398	2		388	1
389	3			402	3		390	3
390	3			403	1		391	2
391	4			405	2		392	2
392	4			407	3		393	2
393	4			408	1		395	2
394	5			409	2		396	3
395	3			410	2		397	2
396	2			411	1		398	1
398	3			412	3		399	2
400	2			413	1		400	2
402	3			414	1		401	2
403	4			415	2		402	2
405	2			416	2		403	6
406	1			417	1		404	2
407	3			418	2		405	2
408	2			419	4		406	3
409	4			420	1		407	1
410	2			421	2		408	1
411	1			422	1		409	3
412	4			423	3		410	3
413	2			424	2		411	3
414	2			425	1		412	1
415	2			426	1		413	1
416	2			427	1		414	2
417	1			430	1		415	1
418	2			431	1		417	2
419	5			434	1		418	2
420	2			435	1		419	7
421	5			437	1		420	1
422	5			439	3		423	2
423	5			440	3		424	1
424	4			442	3		425	3
425	2			443	1		426	3
426	2			447	2		427	6
427	1			450	2		428	2
429	1			452	2		429	3
430	1			454	1		430	2
431	1			455	2		431	3
433	4			457	1		432	2
434	4			458	1		433	2
435	1			459	2		434	1
437	2			461	1		435	1
438	2			463	1		437	1
439	3			464	1		438	4
440	4			465	1		439	2
442	4			466	1		440	1
443	1			467	1		441	2
444	1			469	1		442	2
445	2			471	1		444	2
446	1			472	3		445	2
447	2			473	1		446	3
450	3			475	1		447	1
452	2			476	1		448	3
453	2			477	1		450	2
454	2			481	1		451	1
455	3			485	1		452	3
457	2			486	1		453	1
458	2			487	2		454	2
459	3			488	1		455	1
461	1			490	1		456	1
463	1			493	2		457	1
464	1			496	1		458	1
465	1			497	1		460	2
466	1			498	1		463	3
467	2			499	1		464	1
468	1			502	1		466	3
469	3			505	1		467	1
471	1			508	1		469	1
472	4			510	1		470	3
473	3			513	1		471	1
474	1			514	1		472	1
475	1			517	1		474	1
476	2			519	1		475	3
477	1			520	2		476	5
479	1			521	2		479	2
480	1			525	1		481	2
481	1			527	1		482	2
482	1			528	1		486	2
483	1			529	1		487	3
484	1			530	2		488	1
485	1			531	1		489	1
486	1			532	1		490	1
487	2			533	2		491	2
488	2			534	1		493	2
489	1			536	1		494	1
490	2			537	1		496	2
491	1			539	3		498	3
493	2			543	1		500	1
494	2			545	1		501	2
496	1			546	1		502	1
497	1			549	1		505	1
498	1			551	1		506	2
499	1			553	1		511	1
500	1			557	2		512	1
501	1			558	1		513	2
502	2			559	1		514	1
503	1			561	1		515	2
504	1			562	1		516	3
505	2			564	2		521	1
507	1			569	1		522	4
508	2			570	1		524	1
510	2			573	2		525	3
512	1			575	2		526	2
513	2			582	1		527	3
514	1			583	1		528	1
515	1			585	1		529	1
517	3			589	1		530	2
518	1			602	3		532	1
519	2			604	1		534	2
520	5			613	1		535	1
521	3			616	1		537	1
524	1			618	1		538	3
525	2			620	1		539	1
527	1			622	1		540	2
528	1			623	1		541	1
529	2			629	1		542	1
530	2			637	1		545	3
531	1			638	1		548	1
532	2			640	1		549	1
533	3			644	1		550	1
534	1			647	1		551	1
535	1			651	1		552	1
536	1			652	1		553	3
537	1			653	2		557	1
538	1			654	1		559	2
539	4			662	1		561	2
540	1			663	1		562	1
543	2			669	1		563	1
544	2			674	1		564	2
545	1			676	1		566	1
546	1			682	1		568	1
547	2			683	2		572	1
548	1			684	1		573	1
549	1			687	1		574	1
551	3			688	1		575	1
553	1			695	1		577	1
555	1			697	2		580	1
557	2			698	1		582	2
558	2			701	1		585	1
559	1			705	1		586	3
561	1			707	1		590	1
562	2			708	1		591	2
564	2			710	1		594	3
566	1			711	1		596	1
567	1			713	1		599	2
569	1			717	1		604	1
570	1			725	1		605	2
571	1			728	1		606	1
573	2			741	1		608	1
575	2			743	1		609	1
576	1			746	1		611	1
577	1			747	1		614	2
579	2			752	1		616	1
580	1			753	1		620	2
582	1			760	2		622	1
583	1			766	1		625	1
585	1			769	1		626	1
586	1			771	1		628	2
588	1			776	1		629	1
589	1			788	1		631	1
592	2			790	1		635	1
595	2			798	2		636	1
598	1			806	1		639	1
600	1			810	1		640	1
602	3			812	1		649	1
604	1			813	1		651	2
606	1			823	1		652	1
607	1			828	1		653	2
613	1			841	1		654	1
614	1			843	1		655	1
616	2			849	1		656	1
618	1			854	1		657	2
619	1			864	1		658	1
620	1			869	1		660	2
621	1			871	1		661	3
622	1			890	1		663	1
623	1			896	1		665	1
629	1			900	1		666	1
637	1			903	1		667	1
638	3			909	1		668	1
639	1			917	1		672	1
640	1			921	1		676	1
642	1			932	1		677	1
643	1			933	1		678	1
644	1			939	1		688	2
646	1			960	1		691	2
647	1			977	1		692	1
648	1			983	1		693	1
651	1			984	1		694	1
652	1			1002	1		698	1
653	2			1034	1		704	1
654	1			1040	1		706	1
655	2			1059	1		709	1
659	1			1064	1		710	2
662	3			1068	1		713	2
663	1			1071	1		714	1
667	1			1119	1		717	1
669	1			1120	1		722	1
670	1			1157	1		727	2
674	1			1182	1		730	2
676	1			1247	1		732	1
682	1			1250	1		734	1
683	2			1265	2		737	1
684	1			1270	1		741	1
685	1			1280	1		742	1
687	1			1314	1		749	1
688	1			1349	1		752	1
691	1			1420	1		753	1
695	1			1548	1		755	1
697	2			1652	1		756	1
698	1			1708	1		760	1
701	1			1766	1		762	1
702	1			2230	1		764	1
705	2			3048	1		766	2
707	1						769	1
708	1						771	1
709	1						773	1
710	1						774	1
711	1						778	1
712	2						783	1
713	1						790	2
715	1						795	1
717	2						796	1
720	1						807	1
725	1						809	1
728	1						824	1
736	1						828	1
737	1						831	1
741	1						842	1
742	1						844	1
743	2						845	1
746	3						847	1
747	1						848	1
752	1						849	1
753	1						851	1
760	2						856	2
765	1						862	1
766	1						871	2
769	1						872	1
770	1						873	1
771	1						881	1
774	1						883	1
776	1						888	1
788	2						894	1
790	1						895	1
792	1						897	1
795	1						899	1
797	1						900	1
798	3						914	1
806	1						921	2
810	1						926	1
812	1						942	1
813	1						950	1
815	1						952	1
818	1						953	1
823	1						954	1
826	1						960	1
828	1						981	1
841	1						985	1
843	2						986	1
845	1						987	1
849	1						1012	1
851	1						1013	1
854	1						1019	1
858	1						1032	1
864	1						1035	1
869	1						1038	1
871	1						1041	1
882	1						1050	1
890	1						1060	2
896	1						1069	1
900	1						1079	1
902	1						1082	1
903	1						1130	1
905	1						1131	1
909	1						1141	1
917	2						1147	1
921	1						1153	1
932	1						1168	1
933	1						1216	1
939	1						1217	1
960	1						1235	1
973	1						1262	1
975	1						1276	1
977	1						1315	1
983	1						1446	1
984	1						1478	1
1002	1						1486	1
1003	1						1498	1
1032	1						1522	1
1034	1						1573	1
1040	1						1659	1
1059	1
1060	1
1064	1
1068	1
1071	1
1115	1
1119	1
1120	1
1156	1
1157	1
1158	1
1182	1
1189	1
1211	1
1247	1
1250	1
1265	2
1270	1
1280	1
1314	1
1349	1
1420	1
1548	1
1560	1
1652	1
1708	1
1709	1
1766	1
2230	1
2310	1
2637	1
3048	1

## Sheet: CEGMAcompare
																								43	59	46	47	52	329	333
																								missing in dbg2olc runs:
scfldname	len	scfldnr		len (kb)			len1000input		len500input		len1000gMIS_k19		len1000MIS		len1000b_k19		len1000c		len1000h			size (kb, rounded)	all 339 scaffolds	missing-1000g_k19	missing 1000	missing-1000b_k19	missing 1000c	missing 1000h	input1000	input500
scf7180042487813	17365	7180042487813		17			17365	17	17365	17	15649	16	18126	18	17365	17	17365	17	17365	17		0	1	1	1	1	1	1	0	0
scf7180042488420	25097	7180042488420		25			25097	25	25097	25	14643	15	11592	12	14643	15	15649	16	15649	16		1	11	11	10	10	10	9	7	11
scf7180042489082	15649	7180042489082		16			15649	16	15649	16	13345	13	14643	15	13670	14	18126	18	18126	18		2	17	9	9	8	8	8	17	17
scf7180042490245	22988	7180042490245		23			22988	23	22988	23	15365	15	13345	13	13345	13	10078	10	10078	10		3	38	2	6	4	2	3	38	38
scf7180042490792	21739	7180042490792		22			21739	22	21739	22	11853	12	5765	6	15365	15	14643	15	14643	15		4	35	4	4	4	3	3	35	35
scf7180042491554	19406	7180042491554		19			19406	19	19406	19	6791	7	12860	13	11853	12	13118	13	13118	13		5	39	5	5	4	5	5	39	39
scf7180042492536	22812	7180042492536		23			22812	23	22812	23	9428	9	4716	5	10481	10	13345	13	13345	13		6	36	1	6	2	3	2	36	36
scf7180042494986	18126	7180042494986		18			18126	18	18126	18	3806	4	15365	15	9428	9	11909	12	11909	12		7	33	4	4	3	3	5	33	33
scf7180042497526	14458	7180042497526		14			14458	14	14458	14	7349	7	10632	11	3806	4	15365	15	15365	15		8	24	0	2	2	1	2	24	24
scf7180042497937	14500	7180042497937		15			14500	15	14500	15	4981	5	11853	12	8472	8	11853	12	10632	11		9	21	1	3	1	1	1	21	21
scf7180042499891	16905	7180042499891		17			16905	17	16905	17	6768	7	11044	11	7529	8	8087	8	10123	10		10	17	0	0	1	1	3	17	17
scf7180042500129	16340	7180042500129		16			16340	16	16340	16	4497	4	9428	9	6017	6	9428	9	11853	12		11	17	0	2	0	0	1	17	17
scf7180042500511	12424	7180042500511		12			12424	12	12424	12	1344	1	3806	4	6768	7	3806	4	10481	10		12	21	1	2	1	2	2	21	21
scf7180042502392	20803	7180042502392		21			20803	21	20803	21	2159	2	7826	8	6433	6	6017	6	8087	8		13	8	1	2	1	2	2	8	8
scf7180042502770	9779	7180042502770		10			9779	10	9779	10	5258	5	8657	9	1344	1	6768	7	6791	7		14	4	0	0	1	0	0	4	4
scf7180042505528	13983	7180042505528		14			13983	14	13983	14	7311	7	6306	6	2159	2	6433	6	9428	9		15	4	2	2	2	2	2	4	4
scf7180042505676	11592	7180042505676		12			11592	12	11592	12	5514	6	6395	6	5258	5	5546	6	3806	4		16	3	1	0	0	1	1	3	3
scf7180042506896	9494	7180042506896		9			9494	9	9494	9	5015	5	8516	9	7311	7	7238	7	8250	8		17	3	0	0	1	1	1	3	3
scf7180042508808	17178	7180042508808		17			17178	17	17178	17	4722	5	6029	6	5015	5	1344	1	6306	6		18	1	0	1	0	1	1	1	1
scf7180042512679	11801	7180042512679		12			11801	12	11801	12	2122	2	7850	8	6555	7	2159	2	6768	7		19	1	0	0	0	0	0	1	1
scf7180042517621	16242	7180042517621		16			16242	16	16242	16	1573	2	6768	7	4722	5	5258	5	7238	7		20	0	0	0	0	0	0	0	0
scf7180042519268	11465	7180042519268		11			11465	11	11465	11	1679	2	6433	6	2122	2	7311	7	1344	1		21	1	0	0	0	0	0	1	1
scf7180042520676	5394	7180042520676		5			5394	5	5394	5	4060	4	4497	4	1573	2	5015	5	6676	7		22	1	0	0	0	0	0	1	1
scf7180042521378	10078	7180042521378		10			10078	10	10078	10	3698	4	7238	7	1679	2	5039	5	5133	5		23	2	0	0	0	0	0	2	2
scf7180042523606	14643	7180042523606		15			14643	15	14643	15	5154	5	1344	1	4060	4	4722	5	5268	5		24	0	0	0	0	0	0	0	0
scf7180042524170	10016	7180042524170		10			10016	10	10016	10	2719	3	6676	7	3698	4	2122	2	2159	2		25	1	0	0	0	0	0	1	1
scf7180042524711	14908	7180042524711		15			14908	15	14908	15	1248	1	5268	5	4517	5	1573	2	5258	5		26	0	0	0	0	0	0	0	0
scf7180042531712	11223	7180042531712		11			11223	11	11223	11	1311	1	2159	2	2719	3	1679	2	7311	7		27	0	0	0	0	0	0	0	0
scf7180042532009	12217	7180042532009		12			12217	12	12217	12	1291	1	5258	5	3244	3	5345	5	5514	6		28	0	0	0	0	0	0	0	0
scf7180042532319	13314	7180042532319		13			13314	13	13314	13	1858	2	7311	7	1311	1	4060	4	5015	5		29	0	0	0	0	0	0	0	0
scf7180042532892	13670	7180042532892		14			13670	14	13670	14	846	1	5514	6	1291	1	3698	4	4722	5		30	0	0	0	0	0	0	0	0
scf7180042534987	13118	7180042534987		13			13118	13	13118	13	808	1	5015	5	1858	2	2719	3	2122	2		31	0	0	0	0	0	0	0	0
scf7180042535365	10420	7180042535365		10			10420	10	10420	10	508	1	4722	5	846	1	1248	1	1573	2		32	0	0	0	0	0	0	0	0
scf7180042535524	12237	7180042535524		12			12237	12	12237	12	2889	3	2122	2	808	1	1311	1	1679	2		33	0	0	0	0	0	0	0	0
scf7180042540769	10636	7180042540769		11			10636	11	10636	11	1559	2	1573	2	508	1	1291	1	4060	4		34	0	0	0	0	0	0	0	0
scf7180042540779	12671	7180042540779		13			12671	13	12671	13	1239	1	1679	2	3634	4	1858	2	3698	4		35	0	0	0	0	0	0	0	0
scf7180042541807	12957	7180042541807		13			12957	13	12957	13	1334	1	4060	4	2889	3	846	1	2719	3		36	0	0	0	0	0	0	0	0
scf7180042542321	11046	7180042542321		11			11046	11	11046	11	777	1	3698	4	1559	2	808	1	1311	1		37	0	0	0	0	0	0	0	0
scf7180042544300	11414	7180042544300		11			11414	11	11414	11	2139	2	2719	3	1239	1	508	1	1291	1		38	0	0	0	0	0	0	0	0
scf7180042546343	9022	7180042546343		9			9022	9	9022	9	2278	2	1311	1	2537	3	2889	3	1858	2		39	0	0	0	0	0	0	0	0
scf7180042551642	10936	7180042551642		11			10936	11	10936	11	1155	1	1291	1	1334	1	1559	2	846	1		40	0	0	0	0	0	0	0	0
scf7180042551714	10262	7180042551714		10			10262	10	10262	10	396	0	1858	2	777	1	1239	1	808	1		41	0	0	0	0	0	0	0	0
scf7180042551875	13345	7180042551875		13			13345	13	13345	13	1729	2	846	1	2139	2	1334	1	508	1		42	0	0	0	0	0	0	0	0
scf7180042552278	9862	7180042552278		10			9862	10	9862	10			3143	3	1155	1	777	1	2889	3		43	0	0	0	0	0	0	0	0
scf7180042554375	12244	7180042554375		12			12244	12	12244	12			808	1	396	0	2139	2	1559	2		44	0	0	0	0	0	0	0	0
scf7180042554936	12387	7180042554936		12			12387	12	12387	12			508	1	1729	2	396	0	1239	1		45	0	0	0	0	0	0	0	0
scf7180042565213	12490	7180042565213		12			12490	12	12490	12			3222	3			1729	2	2580	3		46	0	0	0	0	0	0	0	0
scf7180042565626	11070	7180042565626		11			11070	11	11070	11			2967	3					1334	1		47	0	0	0	0	0	0	0	0
scf7180042565715	12466	7180042565715		12			12466	12	12466	12			2889	3					777	1		48	0	0	0	0	0	0	0	0
scf7180042566503	11909	7180042566503		12			11909	12	11909	12			1559	2					2139	2		49	0	0	0	0	0	0	0	0
scf7180042567094	9740	7180042567094		10			9740	10	9740	10			1239	1					396	0		50	0	0	0	0	0	0	0	0
scf7180042567475	12728	7180042567475		13			12728	13	12728	13			2537	3					1729	2		51	0	0	0	0	0	0	0	0
scf7180042567662	13538	7180042567662		14			13538	14	13538	14			1334	1								52	0	0	0	0	0	0	0	0
scf7180042567703	12212	7180042567703		12			12212	12	12212	12			777	1								53	0	0	0	0	0	0	0	0
scf7180042568517	11979	7180042568517		12			11979	12	11979	12			2139	2								54	0	0	0	0	0	0	0	0
scf7180042570137	12480	7180042570137		12			12480	12	12480	12			2060	2								55	0	0	0	0	0	0	0	0
scf7180042574209	5765	7180042574209		6			5765	6	5765	6			1155	1								56	0	0	0	0	0	0	0	0
scf7180042583035	12765	7180042583035		13			12765	13	12765	13			396	0								57	0	0	0	0	0	0	0	0
scf7180042584245	11410	7180042584245		11			11410	11	11410	11			1729	2								58	0	0	0	0	0	0	0	0
scf7180042585733	12123	7180042585733		12			12123	12	12123	12												59	0	0	0	0	0	0	0	0
scf7180042587263	12860	7180042587263		13			12860	13	12860	13												60	0	0	0	0	0	0	0	0
scf7180042594350	4716	7180042594350		5			4716	5	4716	5												61	0	0	0	0	0	0	0	0
scf7180042602792	15365	7180042602792		15			15365	15	15365	15												62	0	0	0	0	0	0	0	0
scf7180042602994	12407	7180042602994		12			12407	12	12407	12												63	0	0	0	0	0	0	0	0
scf7180042603512	10632	7180042603512		11			10632	11	10632	11												64	0	0	0	0	0	0	0	0
scf7180042604655	9374	7180042604655		9			9374	9	9374	9												65	0	0	0	0	0	0	0	0
scf7180042604859	11946	7180042604859		12			11946	12	11946	12												66	0	0	0	0	0	0	0	0
scf7180042605100	10204	7180042605100		10			10204	10	10204	10												67	0	0	0	0	0	0	0	0
scf7180042605101	10033	7180042605101		10			10033	10	10033	10												68	0	0	0	0	0	0	0	0
scf7180042605807	10423	7180042605807		10			10423	10	10423	10												69	0	0	0	0	0	0	0	0
scf7180042607807	12447	7180042607807		12			12447	12	12447	12												70	0	0	0	0	0	0	0	0
scf7180042629417	11154	7180042629417		11			11154	11	11154	11												71	0	0	0	0	0	0	0	0
scf7180042629491	10627	7180042629491		11			10627	11	10627	11												72	0	0	0	0	0	0	0	0
scf7180042629605	10123	7180042629605		10			10123	10	10123	10												73	0	0	0	0	0	0	0	0
scf7180042629844	5852	7180042629844		6			5852	6	5852	6												74	0	0	0	0	0	0	0	0
scf7180042630691	12222	7180042630691		12			12222	12	12222	12												75	0	0	0	0	0	0	0	0
scf7180042630829	9363	7180042630829		9			9363	9	9363	9												76	0	0	0	0	0	0	0	0
scf7180042631830	11853	7180042631830		12			11853	12	11853	12												77	0	0	0	0	0	0	0	0
scf7180042632111	10481	7180042632111		10			10481	10	10481	10												78	0	0	0	0	0	0	0	0
scf7180042632309	11116	7180042632309		11			11116	11	11116	11												79	0	0	0	0	0	0	0	0
scf7180042632950	12146	7180042632950		12			12146	12	12146	12												80	0	0	0	0	0	0	0	0
scf7180042633570	11044	7180042633570		11			11044	11	11044	11												81	0	0	0	0	0	0	0	0
scf7180042635847	9309	7180042635847		9			9309	9	9309	9												82	0	0	0	0	0	0	0	0
scf7180042635980	10968	7180042635980		11			10968	11	10968	11												83	0	0	0	0	0	0	0	0
scf7180042636591	8331	7180042636591		8			8331	8	8331	8												84	0	0	0	0	0	0	0	0
scf7180042639123	7267	7180042639123		7			7267	7	7267	7												85	0	0	0	0	0	0	0	0
scf7180042656045	2517	7180042656045		3			2517	3	2517	3												86	0	0	0	0	0	0	0	0
scf7180042662591	7757	7180042662591		8			7757	8	7757	8												87	0	0	0	0	0	0	0	0
scf7180042663028	10748	7180042663028		11			10748	11	10748	11												88	0	0	0	0	0	0	0	0
scf7180042663061	9407	7180042663061		9			9407	9	9407	9												89	0	0	0	0	0	0	0	0
scf7180042664750	11469	7180042664750		11			11469	11	11469	11												90	0	0	0	0	0	0	0	0
scf7180042665498	7463	7180042665498		7			7463	7	7463	7												91	0	0	0	0	0	0	0	0
scf7180042665582	7895	7180042665582		8			7895	8	7895	8												92	0	0	0	0	0	0	0	0
scf7180042667054	8792	7180042667054		9			8792	9	8792	9												93	0	0	0	0	0	0	0	0
scf7180042668414	9637	7180042668414		10			9637	10	9637	10												94	0	0	0	0	0	0	0	0
scf7180042671123	10596	7180042671123		11			10596	11	10596	11												95	0	0	0	0	0	0	0	0
scf7180042677980	8087	7180042677980		8			8087	8	8087	8												96	0	0	0	0	0	0	0	0
scf7180042706431	6791	7180042706431		7			6791	7	6791	7												97	0	0	0	0	0	0	0	0
scf7180042708539	12196	7180042708539		12			12196	12	12196	12												98	0	0	0	0	0	0	0	0
scf7180042708734	7136	7180042708734		7			7136	7	7136	7												99	0	0	0	0	0	0	0	0
scf7180042708749	9305	7180042708749		9			9305	9	9305	9												100	0
scf7180042709189	8836	7180042709189		9			8836	9	8836	9												101	0
scf7180042710605	9139	7180042710605		9			9139	9	9139	9												102	0
scf7180042711299	10031	7180042711299		10			10031	10	10031	10												103	0
scf7180042714373	9428	7180042714373		9			9428	9	9428	9												104	0
scf7180042715277	8201	7180042715277		8			8201	8	8201	8												105	0
scf7180042716258	7860	7180042716258		8			7860	8	7860	8												106	0
scf7180042718270	6583	7180042718270		7			6583	7	6583	7												107	0
scf7180042725848	6824	7180042725848		7			6824	7	6824	7												108	0
scf7180042729835	3806	7180042729835		4			3806	4	3806	4												109	0
scf7180042744356	4801	7180042744356		5			4801	5	4801	5												110	0
scf7180042746965	5502	7180042746965		6			5502	6	5502	6												111	0
scf7180042755928	9998	7180042755928		10			9998	10	9998	10												112	0
scf7180042757480	8535	7180042757480		9			8535	9	8535	9												113	0
scf7180042757715	9030	7180042757715		9			9030	9	9030	9												114	0
scf7180042757919	9997	7180042757919		10			9997	10	9997	10												115	0
scf7180042758546	7826	7180042758546		8			7826	8	7826	8												116	0
scf7180042760092	8242	7180042760092		8			8242	8	8242	8												117	0
scf7180042762495	8657	7180042762495		9			8657	9	8657	9												118	0
scf7180042764384	7505	7180042764384		8			7505	8	7505	8												119	0
scf7180042767104	7731	7180042767104		8			7731	8	7731	8												120	0
scf7180042768444	8472	7180042768444		8			8472	8	8472	8												121	0
scf7180042768601	8634	7180042768601		9			8634	9	8634	9												122	0
scf7180042769982	10209	7180042769982		10			10209	10	10209	10												123	0
scf7180042771151	9159	7180042771151		9			9159	9	9159	9												124	0
scf7180042777854	8581	7180042777854		9			8581	9	8581	9												125	0
scf7180042823689	7994	7180042823689		8			7994	8	7994	8												126	0
scf7180042823950	8488	7180042823950		8			8488	8	8488	8												127	0
scf7180042823971	7722	7180042823971		8			7722	8	7722	8												128	0
scf7180042824733	7331	7180042824733		7			7331	7	7331	7												129	0
scf7180042825308	8183	7180042825308		8			8183	8	8183	8												130	0
scf7180042825417	7989	7180042825417		8			7989	8	7989	8												131	0
scf7180042829159	9343	7180042829159		9			9343	9	9343	9												132	0
scf7180042831062	8412	7180042831062		8			8412	8	8412	8												133	0
scf7180042831791	7529	7180042831791		8			7529	8	7529	8												134	0
scf7180042832855	7349	7180042832855		7			7349	7	7349	7												135	0
scf7180042840086	6017	7180042840086		6			6017	6	6017	6												136	0
scf7180042872167	2708	7180042872167		3			2708	3	2708	3												137	0
scf7180042912254	7751	7180042912254		8			7751	8	7751	8												138	0
scf7180042916884	7198	7180042916884		7			7198	7	7198	7												139	0
scf7180042916978	7804	7180042916978		8			7804	8	7804	8												140	0
scf7180042917833	8250	7180042917833		8			8250	8	8250	8												141	0
scf7180042922711	5878	7180042922711		6			5878	6	5878	6												142	0
scf7180042924038	8502	7180042924038		9			8502	9	8502	9												143	0
scf7180042924497	6306	7180042924497		6			6306	6	6306	6												144	0
scf7180042924765	6395	7180042924765		6			6395	6	6395	6												145	0
scf7180042924824	6448	7180042924824		6			6448	6	6448	6												146	0
scf7180042938275	8516	7180042938275		9			8516	9	8516	9												147	0
scf7180042948702	6235	7180042948702		6			6235	6	6235	6												148	0
scf7180043029263	6029	7180043029263		6			6029	6	6029	6												149	0
scf7180043029339	6311	7180043029339		6			6311	6	6311	6												150	0
scf7180043029755	5139	7180043029755		5			5139	5	5139	5												151	0
scf7180043030721	4981	7180043030721		5			4981	5	4981	5												152	0
scf7180043032276	6535	7180043032276		7			6535	7	6535	7												153	0
scf7180043032290	7157	7180043032290		7			7157	7	7157	7												154	0
scf7180043035945	5692	7180043035945		6			5692	6	5692	6												155	0
scf7180043037960	8104	7180043037960		8			8104	8	8104	8												156	0
scf7180043041251	7850	7180043041251		8			7850	8	7850	8												157	0
scf7180043042546	8268	7180043042546		8			8268	8	8268	8												158	0
scf7180043043522	6979	7180043043522		7			6979	7	6979	7												159	0
scf7180043046599	6963	7180043046599		7			6963	7	6963	7												160	0
scf7180043053925	6208	7180043053925		6			6208	6	6208	6												161	0
scf7180043066319	4471	7180043066319		4			4471	4	4471	4												162	0
scf7180043185088	6768	7180043185088		7			6768	7	6768	7												163	0
scf7180043186853	7278	7180043186853		7			7278	7	7278	7												164	0
scf7180043186960	7256	7180043186960		7			7256	7	7256	7												165	0
scf7180043187022	9209	7180043187022		9			9209	9	9209	9												166	0
scf7180043190005	6247	7180043190005		6			6247	6	6247	6												167	0
scf7180043193212	7135	7180043193212		7			7135	7	7135	7												168	0
scf7180043193983	5799	7180043193983		6			5799	6	5799	6												169	0
scf7180043194621	6433	7180043194621		6			6433	6	6433	6												170	0
scf7180043195577	6420	7180043195577		6			6420	6	6420	6												171	0
scf7180043195770	7495	7180043195770		7			7495	7	7495	7												172	0
scf7180043195831	5557	7180043195831		6			5557	6	5557	6												173	0
scf7180043200836	6605	7180043200836		7			6605	7	6605	7												174	0
scf7180043204792	6038	7180043204792		6			6038	6	6038	6												175	0
scf7180043214795	4854	7180043214795		5			4854	5	4854	5												176	0
scf7180043215550	5546	7180043215550		6			5546	6	5546	6												177	0
scf7180043220922	4497	7180043220922		4			4497	4	4497	4												178	0
scf7180043224615	4917	7180043224615		5			4917	5	4917	5												179	0
scf7180043224623	7238	7180043224623		7			7238	7	7238	7												180	0
scf7180043233431	5006	7180043233431		5			5006	5	5006	5												181	0
scf7180043292122	1344	7180043292122		1			1344	1	1344	1												182	0
scf7180043393767	6676	7180043393767		7			6676	7	6676	7												183	0
scf7180043393826	5967	7180043393826		6			5967	6	5967	6												184	0
scf7180043396159	5133	7180043396159		5			5133	5	5133	5												185	0
scf7180043398586	5175	7180043398586		5			5175	5	5175	5												186	0
scf7180043400835	5268	7180043400835		5			5268	5	5268	5												187	0
scf7180043402540	5561	7180043402540		6			5561	6	5561	6												188	0
scf7180043402632	6405	7180043402632		6			6405	6	6405	6												189	0
scf7180043407190	6815	7180043407190		7			6815	7	6815	7												190	0
scf7180043410333	5082	7180043410333		5			5082	5	5082	5												191	0
scf7180043410762	5840	7180043410762		6			5840	6	5840	6												192	0
scf7180043411356	4139	7180043411356		4			4139	4	4139	4												193	0
scf7180043413238	6383	7180043413238		6			6383	6	6383	6												194	0
scf7180043414473	6569	7180043414473		7			6569	7	6569	7												195	0
scf7180043418305	4193	7180043418305		4			4193	4	4193	4												196	0
scf7180043418796	6582	7180043418796		7			6582	7	6582	7												197	0
scf7180043419505	6719	7180043419505		7			6719	7	6719	7												198	0
scf7180043419768	4430	7180043419768		4			4430	4	4430	4												199	0
scf7180043433398	5686	7180043433398		6			5686	6	5686	6												200	0
scf7180043437329	6333	7180043437329		6			6333	6	6333	6												201	0
scf7180043455988	4184	7180043455988		4			4184	4	4184	4												202	0
scf7180043502554	2159	7180043502554		2			2159	2	2159	2												203	0
scf7180043684590	6643	7180043684590		7			6643	7	6643	7												204	0
scf7180043684748	4324	7180043684748		4			4324	4	4324	4												205	0
scf7180043684923	5258	7180043684923		5			5258	5	5258	5												206	0
scf7180043686295	4774	7180043686295		5			4774	5	4774	5												207	0
scf7180043686317	6630	7180043686317		7			6630	7	6630	7												208	0
scf7180043689942	5323	7180043689942		5			5323	5	5323	5												209	0
scf7180043690598	7311	7180043690598		7			7311	7	7311	7												210	0
scf7180043691495	5900	7180043691495		6			5900	6	5900	6												211	0
scf7180043698668	7148	7180043698668		7			7148	7	7148	7												212	0
scf7180043700957	6774	7180043700957		7			6774	7	6774	7												213	0
scf7180043701517	4150	7180043701517		4			4150	4	4150	4												214	0
scf7180043701805	5514	7180043701805		6			5514	6	5514	6												215	0
scf7180043706770	6100	7180043706770		6			6100	6	6100	6												216	0
scf7180043707007	4719	7180043707007		5			4719	5	4719	5												217	0
scf7180043711146	5017	7180043711146		5			5017	5	5017	5												218	0
scf7180043713012	5015	7180043713012		5			5015	5	5015	5												219	0
scf7180043718731	5027	7180043718731		5			5027	5	5027	5												220	0
scf7180043720146	7121	7180043720146		7			7121	7	7121	7												221	0
scf7180043723986	6787	7180043723986		7			6787	7	6787	7												222	0
scf7180043727006	5785	7180043727006		6			5785	6	5785	6												223	0
scf7180043734481	6555	7180043734481		7			6555	7	6555	7												224	0
scf7180043734758	4856	7180043734758		5			4856	5	4856	5												225	0
scf7180043740125	5039	7180043740125		5			5039	5	5039	5												226	0
scf7180043753399	3020	7180043753399		3			3020	3	3020	3												227	0
scf7180043769752	3660	7180043769752		4			3660	4	3660	4												228	0
scf7180043776891	4722	7180043776891		5			4722	5	4722	5												229	0
scf7180043780866	2559	7180043780866		3			2559	3	2559	3												230	0
scf7180043803264	2122	7180043803264		2			2122	2	2122	2												231	0
scf7180043863741	1573	7180043863741		2			1573	2	1573	2												232	0
scf7180043878497	1679	7180043878497		2			1679	2	1679	2												233	0
scf7180044096800	4840	7180044096800		5			4840	5	4840	5												234	0
scf7180044097927	5791	7180044097927		6			5791	6	5791	6												235	0
scf7180044106219	5074	7180044106219		5			5074	5	5074	5												236	0
scf7180044111275	4981	7180044111275		5			4981	5	4981	5												237	0
scf7180044111461	5345	7180044111461		5			5345	5	5345	5												238	0
scf7180044113177	4149	7180044113177		4			4149	4	4149	4												239	0
scf7180044113597	5705	7180044113597		6			5705	6	5705	6												240	0
scf7180044114482	4503	7180044114482		5			4503	5	4503	5												241	0
scf7180044114951	4819	7180044114951		5			4819	5	4819	5												242	0
scf7180044120414	5695	7180044120414		6			5695	6	5695	6												243	0
scf7180044123199	4424	7180044123199		4			4424	4	4424	4												244	0
scf7180044128050	4908	7180044128050		5			4908	5	4908	5												245	0
scf7180044133456	6373	7180044133456		6			6373	6	6373	6												246	0
scf7180044134534	4060	7180044134534		4			4060	4	4060	4												247	0
scf7180044134535	5066	7180044134535		5			5066	5	5066	5												248	0
scf7180044138066	5105	7180044138066		5			5105	5	5105	5												249	0
scf7180044155553	3949	7180044155553		4			3949	4	3949	4												250	0
scf7180044209722	3698	7180044209722		4			3698	4	3698	4												251	0
scf7180044236102	2551	7180044236102		3			2551	3	2551	3												252	0
scf7180044680283	3524	7180044680283		4			3524	4	3524	4												253	0
scf7180044682364	4191	7180044682364		4			4191	4	4191	4												254	0
scf7180044684081	4510	7180044684081		5			4510	5	4510	5												255	0
scf7180044684847	5640	7180044684847		6			5640	6	5640	6												256	0
scf7180044686304	4517	7180044686304		5			4517	5	4517	5												257	0
scf7180044689982	2540	7180044689982		3			2540	3	2540	3												258	0
scf7180044690651	4461	7180044690651		4			4461	4	4461	4												259	0
scf7180044690912	3317	7180044690912		3			3317	3	3317	3												260	0
scf7180044691729	4058	7180044691729		4			4058	4	4058	4												261	0
scf7180044697643	5154	7180044697643		5			5154	5	5154	5												262	0
scf7180044703488	4553	7180044703488		5			4553	5	4553	5												263	0
scf7180044707871	4389	7180044707871		4			4389	4	4389	4												264	0
scf7180044735823	2719	7180044735823		3			2719	3	2719	3												265	0
scf7180044737013	3661	7180044737013		4			3661	4	3661	4												266	0
scf7180044744262	4287	7180044744262		4			4287	4	4287	4												267	0
scf7180044745789	4725	7180044745789		5			4725	5	4725	5												268	0
scf7180044746433	2840	7180044746433		3			2840	3	2840	3												269	0
scf7180044769026	3244	7180044769026		3			3244	3	3244	3												270	0
scf7180044771821	2981	7180044771821		3			2981	3	2981	3												271	0
scf7180044773788	2990	7180044773788		3			2990	3	2990	3												272	0
scf7180044774118	3756	7180044774118		4			3756	4	3756	4												273	0
scf7180044898120	1248	7180044898120		1			1248	1	1248	1												274	0
scf7180044912620	1311	7180044912620		1			1311	1	1311	1												275	0
scf7180044943173	1291	7180044943173		1			1291	1	1291	1												276	0
scf7180044966580	1858	7180044966580		2			1858	2	1858	2												277	0
scf7180045050770	846	7180045050770		1			3143	3	846	1												278	0
scf7180045527545	3143	7180045527545		3			4184	4	3143	3												279	0
scf7180045529631	4184	7180045529631		4			3844	4	4184	4												280	0
scf7180045531272	3844	7180045531272		4			5364	5	3844	4												281	0
scf7180045532710	5364	7180045532710		5			3187	3	5364	5												282	0
scf7180045533954	3187	7180045533954		3			3295	3	3187	3												283	0
scf7180045534012	3295	7180045534012		3			4318	4	3295	3												284	0
scf7180045538187	4318	7180045538187		4			3561	4	4318	4												285	0
scf7180045538898	3561	7180045538898		4			3289	3	3561	4												286	0
scf7180045547170	3289	7180045547170		3			4188	4	3289	3												287	0
scf7180045548507	4188	7180045548507		4			4618	5	4188	4												288	0
scf7180045564805	4618	7180045564805		5			5042	5	4618	5												289	0
scf7180045565985	5042	7180045565985		5			3324	3	5042	5												290	0
scf7180045580271	3324	7180045580271		3			3663	4	3324	3												291	0
scf7180045587131	3663	7180045587131		4			4338	4	3663	4												292	0
scf7180045590894	4338	7180045590894		4			4026	4	4338	4												293	0
scf7180045592182	4026	7180045592182		4			2438	2	4026	4												294	0
scf7180045620138	2438	7180045620138		2			3353	3	2438	2												295	0
scf7180045628270	3353	7180045628270		3			2761	3	3353	3												296	0
scf7180045629759	2761	7180045629759		3			3332	3	2761	3												297	0
scf7180046302773	808	7180046302773		1			3948	4	808	1												298	0
scf7180046388415	508	7180046388415		1			2938	3	508	1												299	0
scf7180046728187	3332	7180046728187		3			3222	3	3332	3												300	0
scf7180046730009	3948	7180046730009		4			2967	3	3948	4												301	0
scf7180046730348	2938	7180046730348		3			2910	3	2938	3												302	0
scf7180046752351	3222	7180046752351		3			4461	4	3222	3												303	0
scf7180046753180	2967	7180046753180		3			3634	4	2967	3												304	0
scf7180046756028	2910	7180046756028		3			2369	2	2910	3												305	0
scf7180046770881	4461	7180046770881		4			2889	3	4461	4												306	0
scf7180046785064	3634	7180046785064		4			2477	2	3634	4												307	0
scf7180046793872	2369	7180046793872		2			3437	3	2369	2												308	0
scf7180046812034	2889	7180046812034		3			2746	3	2889	3												309	0
scf7180046813258	2477	7180046813258		2			2458	2	2477	2												310	0
scf7180046816278	3437	7180046816278		3			1559	2	3437	3												311	0
scf7180046825955	2746	7180046825955		3			1239	1	2746	3												312	0
scf7180046855562	2458	7180046855562		2			2220	2	2458	2												313	0
scf7180046952905	1559	7180046952905		2			2659	3	1559	2												314	0
scf7180047160251	1239	7180047160251		1			3101	3	1239	1												315	0
scf7180048403789	2220	7180048403789		2			2448	2	2220	2												316	0
scf7180048417602	2659	7180048417602		3			3532	4	2659	3												317	0
scf7180048437854	3101	7180048437854		3			2817	3	3101	3												318	0
scf7180048439906	2448	7180048439906		2			2854	3	2448	2												319	0
scf7180048440485	3532	7180048440485		4			3092	3	3532	4												320	0
scf7180048444103	2817	7180048444103		3			3166	3	2817	3												321	0
scf7180048456905	2854	7180048456905		3			2580	3	2854	3												322	0
scf7180048460522	3092	7180048460522		3			2699	3	3092	3												323	0
scf7180048464245	3166	7180048464245		3			2537	3	3166	3												324	0
scf7180048469075	2580	7180048469075		3			2720	3	2580	3												325	0
scf7180048477801	2699	7180048477801		3			1838	2	2699	3												326	0
scf7180048496221	2537	7180048496221		3			1334	1	2537	3												327	0
scf7180048509330	2720	7180048509330		3			2139	2	2720	3												328	0
scf7180048515927	1838	7180048515927		2			2060	2	1838	2												329	0
scf7180048697209	1334	7180048697209		1			2278	2	1334	1												330	0
scf7180048744466	777	7180048744466		1			1155	1	777	1												331	0
scf7180050625254	2139	7180050625254		2			1729	2	2139	2												332	0
scf7180050630530	2060	7180050630530		2			2801	3	2060	2												333	0
scf7180050632747	2278	7180050632747		2					2278	2												334	0
scf7180050656228	1155	7180050656228		1					1155	1												335	0
scf7180050738316	396	7180050738316		0					1729	2												336	0
scf7180050890014	1729	7180050890014		2					2801	3												337	0
scf7180051018318	2801	7180051018318		3																		338	0
																						339	0
																						340	0
																						341	0
																						342	0
																						343	0
																						344	0
																						345	0
																						346	0
																						347	0
																						348	0
																						349	0
																						350	0
																						351	0
																						352	0
																						353	0
																						354	0
																						355	0
																						356	0
																						357	0
																						358	0
																						359	0
																						360	0
																						361	0
																						362	0
																						363	0
																						364	0
																						365	0
																						366	0
																						367	0
																						368	0
																						369	0
																						370	0
																						371	0
																						372	0
																						373	0
																						374	0
																						375	0
																						376	0
																						377	0
																						378	0
																						379	0
																						380	0
																						381	0
																						382	0
																						383	0
																						384	0
																						385	0
																						386	0
																						387	0
																						388	0
																						389	0
																						390	0
																						391	0
																						392	0
																						393	0
																						394	0
																						395	0
																						396	0
																						397	0
																						398	0
																						399	0
																						400	0
																						401	0
																						402	0
																						403	0
																						404	0
																						405	0
																						406	0
																						407	0
																						408	0
																						409	0
																						410	0
																						411	0
																						412	0
																						413	0
																						414	0
																						415	0
																						416	0
																						417	0
																						418	0
																						419	0
																						420	0
																						421	0
																						422	0
																						423	0
																						424	0
																						425	0
																						426	0
																						427	0
																						428	0
																						429	0
																						430	0
																						431	0
																						432	0
																						433	0
																						434	0
																						435	0
																						436	0
																						437	0
																						438	0
																						439	0
																						440	0
																						441	0
																						442	0
																						443	0
																						444	0
																						445	0
																						446	0
																						447	0
																						448	0
																						449	0
																						450	0
																						451	0
																						452	0
																						453	0
																						454	0
																						455	0
																						456	0
																						457	0
																						458	0
																						459	0
																						460	0
																						461	0
																						462	0
																						463	0
																						464	0
																						465	0
																						466	0
																						467	0
																						468	0
																						469	0
																						470	0
																						471	0
																						472	0
																						473	0
																						474	0
																						475	0
																						476	0
																						477	0
																						478	0
																						479	0
																						480	0
																						481	0
																						482	0
																						483	0
																						484	0
																						485	0
																						486	0
																						487	0
																						488	0
																						489	0
																						490	0
																						491	0
																						492	0
																						493	0
																						494	0
																						495	0
																						496	0
																						497	0
																						498	0
																						499	0
																						500	0
																						501	0
																						502	0
																						503	0
																						504	0

## Sheet: CEGMAscf-input
1000 input	2	len	500 input	2	len
7180042487813	scf7180042487813	17365	7180042487813	scf7180042487813	17365
7180042488420	scf7180042488420	25097	7180042488420	scf7180042488420	25097
7180042489082	scf7180042489082	15649	7180042489082	scf7180042489082	15649
7180042490245	scf7180042490245	22988	7180042490245	scf7180042490245	22988
7180042490792	scf7180042490792	21739	7180042490792	scf7180042490792	21739
7180042491554	scf7180042491554	19406	7180042491554	scf7180042491554	19406
7180042492536	scf7180042492536	22812	7180042492536	scf7180042492536	22812
7180042494986	scf7180042494986	18126	7180042494986	scf7180042494986	18126
7180042497526	scf7180042497526	14458	7180042497526	scf7180042497526	14458
7180042497937	scf7180042497937	14500	7180042497937	scf7180042497937	14500
7180042499891	scf7180042499891	16905	7180042499891	scf7180042499891	16905
7180042500129	scf7180042500129	16340	7180042500129	scf7180042500129	16340
7180042500511	scf7180042500511	12424	7180042500511	scf7180042500511	12424
7180042502392	scf7180042502392	20803	7180042502392	scf7180042502392	20803
7180042502770	scf7180042502770	9779	7180042502770	scf7180042502770	9779
7180042505528	scf7180042505528	13983	7180042505528	scf7180042505528	13983
7180042505676	scf7180042505676	11592	7180042505676	scf7180042505676	11592
7180042506896	scf7180042506896	9494	7180042506896	scf7180042506896	9494
7180042508808	scf7180042508808	17178	7180042508808	scf7180042508808	17178
7180042512679	scf7180042512679	11801	7180042512679	scf7180042512679	11801
7180042517621	scf7180042517621	16242	7180042517621	scf7180042517621	16242
7180042519268	scf7180042519268	11465	7180042519268	scf7180042519268	11465
7180042520676	scf7180042520676	5394	7180042520676	scf7180042520676	5394
7180042521378	scf7180042521378	10078	7180042521378	scf7180042521378	10078
7180042523606	scf7180042523606	14643	7180042523606	scf7180042523606	14643
7180042524170	scf7180042524170	10016	7180042524170	scf7180042524170	10016
7180042524711	scf7180042524711	14908	7180042524711	scf7180042524711	14908
7180042531712	scf7180042531712	11223	7180042531712	scf7180042531712	11223
7180042532009	scf7180042532009	12217	7180042532009	scf7180042532009	12217
7180042532319	scf7180042532319	13314	7180042532319	scf7180042532319	13314
7180042532892	scf7180042532892	13670	7180042532892	scf7180042532892	13670
7180042534987	scf7180042534987	13118	7180042534987	scf7180042534987	13118
7180042535365	scf7180042535365	10420	7180042535365	scf7180042535365	10420
7180042535524	scf7180042535524	12237	7180042535524	scf7180042535524	12237
7180042540769	scf7180042540769	10636	7180042540769	scf7180042540769	10636
7180042540779	scf7180042540779	12671	7180042540779	scf7180042540779	12671
7180042541807	scf7180042541807	12957	7180042541807	scf7180042541807	12957
7180042542321	scf7180042542321	11046	7180042542321	scf7180042542321	11046
7180042544300	scf7180042544300	11414	7180042544300	scf7180042544300	11414
7180042546343	scf7180042546343	9022	7180042546343	scf7180042546343	9022
7180042551642	scf7180042551642	10936	7180042551642	scf7180042551642	10936
7180042551714	scf7180042551714	10262	7180042551714	scf7180042551714	10262
7180042551875	scf7180042551875	13345	7180042551875	scf7180042551875	13345
7180042552278	scf7180042552278	9862	7180042552278	scf7180042552278	9862
7180042554375	scf7180042554375	12244	7180042554375	scf7180042554375	12244
7180042554936	scf7180042554936	12387	7180042554936	scf7180042554936	12387
7180042565213	scf7180042565213	12490	7180042565213	scf7180042565213	12490
7180042565626	scf7180042565626	11070	7180042565626	scf7180042565626	11070
7180042565715	scf7180042565715	12466	7180042565715	scf7180042565715	12466
7180042566503	scf7180042566503	11909	7180042566503	scf7180042566503	11909
7180042567094	scf7180042567094	9740	7180042567094	scf7180042567094	9740
7180042567475	scf7180042567475	12728	7180042567475	scf7180042567475	12728
7180042567662	scf7180042567662	13538	7180042567662	scf7180042567662	13538
7180042567703	scf7180042567703	12212	7180042567703	scf7180042567703	12212
7180042568517	scf7180042568517	11979	7180042568517	scf7180042568517	11979
7180042570137	scf7180042570137	12480	7180042570137	scf7180042570137	12480
7180042574209	scf7180042574209	5765	7180042574209	scf7180042574209	5765
7180042583035	scf7180042583035	12765	7180042583035	scf7180042583035	12765
7180042584245	scf7180042584245	11410	7180042584245	scf7180042584245	11410
7180042585733	scf7180042585733	12123	7180042585733	scf7180042585733	12123
7180042587263	scf7180042587263	12860	7180042587263	scf7180042587263	12860
7180042594350	scf7180042594350	4716	7180042594350	scf7180042594350	4716
7180042602792	scf7180042602792	15365	7180042602792	scf7180042602792	15365
7180042602994	scf7180042602994	12407	7180042602994	scf7180042602994	12407
7180042603512	scf7180042603512	10632	7180042603512	scf7180042603512	10632
7180042604655	scf7180042604655	9374	7180042604655	scf7180042604655	9374
7180042604859	scf7180042604859	11946	7180042604859	scf7180042604859	11946
7180042605100	scf7180042605100	10204	7180042605100	scf7180042605100	10204
7180042605101	scf7180042605101	10033	7180042605101	scf7180042605101	10033
7180042605807	scf7180042605807	10423	7180042605807	scf7180042605807	10423
7180042607807	scf7180042607807	12447	7180042607807	scf7180042607807	12447
7180042629417	scf7180042629417	11154	7180042629417	scf7180042629417	11154
7180042629491	scf7180042629491	10627	7180042629491	scf7180042629491	10627
7180042629605	scf7180042629605	10123	7180042629605	scf7180042629605	10123
7180042629844	scf7180042629844	5852	7180042629844	scf7180042629844	5852
7180042630691	scf7180042630691	12222	7180042630691	scf7180042630691	12222
7180042630829	scf7180042630829	9363	7180042630829	scf7180042630829	9363
7180042631830	scf7180042631830	11853	7180042631830	scf7180042631830	11853
7180042632111	scf7180042632111	10481	7180042632111	scf7180042632111	10481
7180042632309	scf7180042632309	11116	7180042632309	scf7180042632309	11116
7180042632950	scf7180042632950	12146	7180042632950	scf7180042632950	12146
7180042633570	scf7180042633570	11044	7180042633570	scf7180042633570	11044
7180042635847	scf7180042635847	9309	7180042635847	scf7180042635847	9309
7180042635980	scf7180042635980	10968	7180042635980	scf7180042635980	10968
7180042636591	scf7180042636591	8331	7180042636591	scf7180042636591	8331
7180042639123	scf7180042639123	7267	7180042639123	scf7180042639123	7267
7180042656045	scf7180042656045	2517	7180042656045	scf7180042656045	2517
7180042662591	scf7180042662591	7757	7180042662591	scf7180042662591	7757
7180042663028	scf7180042663028	10748	7180042663028	scf7180042663028	10748
7180042663061	scf7180042663061	9407	7180042663061	scf7180042663061	9407
7180042664750	scf7180042664750	11469	7180042664750	scf7180042664750	11469
7180042665498	scf7180042665498	7463	7180042665498	scf7180042665498	7463
7180042665582	scf7180042665582	7895	7180042665582	scf7180042665582	7895
7180042667054	scf7180042667054	8792	7180042667054	scf7180042667054	8792
7180042668414	scf7180042668414	9637	7180042668414	scf7180042668414	9637
7180042671123	scf7180042671123	10596	7180042671123	scf7180042671123	10596
7180042677980	scf7180042677980	8087	7180042677980	scf7180042677980	8087
7180042706431	scf7180042706431	6791	7180042706431	scf7180042706431	6791
7180042708539	scf7180042708539	12196	7180042708539	scf7180042708539	12196
7180042708734	scf7180042708734	7136	7180042708734	scf7180042708734	7136
7180042708749	scf7180042708749	9305	7180042708749	scf7180042708749	9305
7180042709189	scf7180042709189	8836	7180042709189	scf7180042709189	8836
7180042710605	scf7180042710605	9139	7180042710605	scf7180042710605	9139
7180042711299	scf7180042711299	10031	7180042711299	scf7180042711299	10031
7180042714373	scf7180042714373	9428	7180042714373	scf7180042714373	9428
7180042715277	scf7180042715277	8201	7180042715277	scf7180042715277	8201
7180042716258	scf7180042716258	7860	7180042716258	scf7180042716258	7860
7180042718270	scf7180042718270	6583	7180042718270	scf7180042718270	6583
7180042725848	scf7180042725848	6824	7180042725848	scf7180042725848	6824
7180042729835	scf7180042729835	3806	7180042729835	scf7180042729835	3806
7180042744356	scf7180042744356	4801	7180042744356	scf7180042744356	4801
7180042746965	scf7180042746965	5502	7180042746965	scf7180042746965	5502
7180042755928	scf7180042755928	9998	7180042755928	scf7180042755928	9998
7180042757480	scf7180042757480	8535	7180042757480	scf7180042757480	8535
7180042757715	scf7180042757715	9030	7180042757715	scf7180042757715	9030
7180042757919	scf7180042757919	9997	7180042757919	scf7180042757919	9997
7180042758546	scf7180042758546	7826	7180042758546	scf7180042758546	7826
7180042760092	scf7180042760092	8242	7180042760092	scf7180042760092	8242
7180042762495	scf7180042762495	8657	7180042762495	scf7180042762495	8657
7180042764384	scf7180042764384	7505	7180042764384	scf7180042764384	7505
7180042767104	scf7180042767104	7731	7180042767104	scf7180042767104	7731
7180042768444	scf7180042768444	8472	7180042768444	scf7180042768444	8472
7180042768601	scf7180042768601	8634	7180042768601	scf7180042768601	8634
7180042769982	scf7180042769982	10209	7180042769982	scf7180042769982	10209
7180042771151	scf7180042771151	9159	7180042771151	scf7180042771151	9159
7180042777854	scf7180042777854	8581	7180042777854	scf7180042777854	8581
7180042823689	scf7180042823689	7994	7180042823689	scf7180042823689	7994
7180042823950	scf7180042823950	8488	7180042823950	scf7180042823950	8488
7180042823971	scf7180042823971	7722	7180042823971	scf7180042823971	7722
7180042824733	scf7180042824733	7331	7180042824733	scf7180042824733	7331
7180042825308	scf7180042825308	8183	7180042825308	scf7180042825308	8183
7180042825417	scf7180042825417	7989	7180042825417	scf7180042825417	7989
7180042829159	scf7180042829159	9343	7180042829159	scf7180042829159	9343
7180042831062	scf7180042831062	8412	7180042831062	scf7180042831062	8412
7180042831791	scf7180042831791	7529	7180042831791	scf7180042831791	7529
7180042832855	scf7180042832855	7349	7180042832855	scf7180042832855	7349
7180042840086	scf7180042840086	6017	7180042840086	scf7180042840086	6017
7180042872167	scf7180042872167	2708	7180042872167	scf7180042872167	2708
7180042912254	scf7180042912254	7751	7180042912254	scf7180042912254	7751
7180042916884	scf7180042916884	7198	7180042916884	scf7180042916884	7198
7180042916978	scf7180042916978	7804	7180042916978	scf7180042916978	7804
7180042917833	scf7180042917833	8250	7180042917833	scf7180042917833	8250
7180042922711	scf7180042922711	5878	7180042922711	scf7180042922711	5878
7180042924038	scf7180042924038	8502	7180042924038	scf7180042924038	8502
7180042924497	scf7180042924497	6306	7180042924497	scf7180042924497	6306
7180042924765	scf7180042924765	6395	7180042924765	scf7180042924765	6395
7180042924824	scf7180042924824	6448	7180042924824	scf7180042924824	6448
7180042938275	scf7180042938275	8516	7180042938275	scf7180042938275	8516
7180042948702	scf7180042948702	6235	7180042948702	scf7180042948702	6235
7180043029263	scf7180043029263	6029	7180043029263	scf7180043029263	6029
7180043029339	scf7180043029339	6311	7180043029339	scf7180043029339	6311
7180043029755	scf7180043029755	5139	7180043029755	scf7180043029755	5139
7180043030721	scf7180043030721	4981	7180043030721	scf7180043030721	4981
7180043032276	scf7180043032276	6535	7180043032276	scf7180043032276	6535
7180043032290	scf7180043032290	7157	7180043032290	scf7180043032290	7157
7180043035945	scf7180043035945	5692	7180043035945	scf7180043035945	5692
7180043037960	scf7180043037960	8104	7180043037960	scf7180043037960	8104
7180043041251	scf7180043041251	7850	7180043041251	scf7180043041251	7850
7180043042546	scf7180043042546	8268	7180043042546	scf7180043042546	8268
7180043043522	scf7180043043522	6979	7180043043522	scf7180043043522	6979
7180043046599	scf7180043046599	6963	7180043046599	scf7180043046599	6963
7180043053925	scf7180043053925	6208	7180043053925	scf7180043053925	6208
7180043066319	scf7180043066319	4471	7180043066319	scf7180043066319	4471
7180043185088	scf7180043185088	6768	7180043185088	scf7180043185088	6768
7180043186853	scf7180043186853	7278	7180043186853	scf7180043186853	7278
7180043186960	scf7180043186960	7256	7180043186960	scf7180043186960	7256
7180043187022	scf7180043187022	9209	7180043187022	scf7180043187022	9209
7180043190005	scf7180043190005	6247	7180043190005	scf7180043190005	6247
7180043193212	scf7180043193212	7135	7180043193212	scf7180043193212	7135
7180043193983	scf7180043193983	5799	7180043193983	scf7180043193983	5799
7180043194621	scf7180043194621	6433	7180043194621	scf7180043194621	6433
7180043195577	scf7180043195577	6420	7180043195577	scf7180043195577	6420
7180043195770	scf7180043195770	7495	7180043195770	scf7180043195770	7495
7180043195831	scf7180043195831	5557	7180043195831	scf7180043195831	5557
7180043200836	scf7180043200836	6605	7180043200836	scf7180043200836	6605
7180043204792	scf7180043204792	6038	7180043204792	scf7180043204792	6038
7180043214795	scf7180043214795	4854	7180043214795	scf7180043214795	4854
7180043215550	scf7180043215550	5546	7180043215550	scf7180043215550	5546
7180043220922	scf7180043220922	4497	7180043220922	scf7180043220922	4497
7180043224615	scf7180043224615	4917	7180043224615	scf7180043224615	4917
7180043224623	scf7180043224623	7238	7180043224623	scf7180043224623	7238
7180043233431	scf7180043233431	5006	7180043233431	scf7180043233431	5006
7180043292122	scf7180043292122	1344	7180043292122	scf7180043292122	1344
7180043393767	scf7180043393767	6676	7180043393767	scf7180043393767	6676
7180043393826	scf7180043393826	5967	7180043393826	scf7180043393826	5967
7180043396159	scf7180043396159	5133	7180043396159	scf7180043396159	5133
7180043398586	scf7180043398586	5175	7180043398586	scf7180043398586	5175
7180043400835	scf7180043400835	5268	7180043400835	scf7180043400835	5268
7180043402540	scf7180043402540	5561	7180043402540	scf7180043402540	5561
7180043402632	scf7180043402632	6405	7180043402632	scf7180043402632	6405
7180043407190	scf7180043407190	6815	7180043407190	scf7180043407190	6815
7180043410333	scf7180043410333	5082	7180043410333	scf7180043410333	5082
7180043410762	scf7180043410762	5840	7180043410762	scf7180043410762	5840
7180043411356	scf7180043411356	4139	7180043411356	scf7180043411356	4139
7180043413238	scf7180043413238	6383	7180043413238	scf7180043413238	6383
7180043414473	scf7180043414473	6569	7180043414473	scf7180043414473	6569
7180043418305	scf7180043418305	4193	7180043418305	scf7180043418305	4193
7180043418796	scf7180043418796	6582	7180043418796	scf7180043418796	6582
7180043419505	scf7180043419505	6719	7180043419505	scf7180043419505	6719
7180043419768	scf7180043419768	4430	7180043419768	scf7180043419768	4430
7180043433398	scf7180043433398	5686	7180043433398	scf7180043433398	5686
7180043437329	scf7180043437329	6333	7180043437329	scf7180043437329	6333
7180043455988	scf7180043455988	4184	7180043455988	scf7180043455988	4184
7180043502554	scf7180043502554	2159	7180043502554	scf7180043502554	2159
7180043684590	scf7180043684590	6643	7180043684590	scf7180043684590	6643
7180043684748	scf7180043684748	4324	7180043684748	scf7180043684748	4324
7180043684923	scf7180043684923	5258	7180043684923	scf7180043684923	5258
7180043686295	scf7180043686295	4774	7180043686295	scf7180043686295	4774
7180043686317	scf7180043686317	6630	7180043686317	scf7180043686317	6630
7180043689942	scf7180043689942	5323	7180043689942	scf7180043689942	5323
7180043690598	scf7180043690598	7311	7180043690598	scf7180043690598	7311
7180043691495	scf7180043691495	5900	7180043691495	scf7180043691495	5900
7180043698668	scf7180043698668	7148	7180043698668	scf7180043698668	7148
7180043700957	scf7180043700957	6774	7180043700957	scf7180043700957	6774
7180043701517	scf7180043701517	4150	7180043701517	scf7180043701517	4150
7180043701805	scf7180043701805	5514	7180043701805	scf7180043701805	5514
7180043706770	scf7180043706770	6100	7180043706770	scf7180043706770	6100
7180043707007	scf7180043707007	4719	7180043707007	scf7180043707007	4719
7180043711146	scf7180043711146	5017	7180043711146	scf7180043711146	5017
7180043713012	scf7180043713012	5015	7180043713012	scf7180043713012	5015
7180043718731	scf7180043718731	5027	7180043718731	scf7180043718731	5027
7180043720146	scf7180043720146	7121	7180043720146	scf7180043720146	7121
7180043723986	scf7180043723986	6787	7180043723986	scf7180043723986	6787
7180043727006	scf7180043727006	5785	7180043727006	scf7180043727006	5785
7180043734481	scf7180043734481	6555	7180043734481	scf7180043734481	6555
7180043734758	scf7180043734758	4856	7180043734758	scf7180043734758	4856
7180043740125	scf7180043740125	5039	7180043740125	scf7180043740125	5039
7180043753399	scf7180043753399	3020	7180043753399	scf7180043753399	3020
7180043769752	scf7180043769752	3660	7180043769752	scf7180043769752	3660
7180043776891	scf7180043776891	4722	7180043776891	scf7180043776891	4722
7180043780866	scf7180043780866	2559	7180043780866	scf7180043780866	2559
7180043803264	scf7180043803264	2122	7180043803264	scf7180043803264	2122
7180043863741	scf7180043863741	1573	7180043863741	scf7180043863741	1573
7180043878497	scf7180043878497	1679	7180043878497	scf7180043878497	1679
7180044096800	scf7180044096800	4840	7180044096800	scf7180044096800	4840
7180044097927	scf7180044097927	5791	7180044097927	scf7180044097927	5791
7180044106219	scf7180044106219	5074	7180044106219	scf7180044106219	5074
7180044111275	scf7180044111275	4981	7180044111275	scf7180044111275	4981
7180044111461	scf7180044111461	5345	7180044111461	scf7180044111461	5345
7180044113177	scf7180044113177	4149	7180044113177	scf7180044113177	4149
7180044113597	scf7180044113597	5705	7180044113597	scf7180044113597	5705
7180044114482	scf7180044114482	4503	7180044114482	scf7180044114482	4503
7180044114951	scf7180044114951	4819	7180044114951	scf7180044114951	4819
7180044120414	scf7180044120414	5695	7180044120414	scf7180044120414	5695
7180044123199	scf7180044123199	4424	7180044123199	scf7180044123199	4424
7180044128050	scf7180044128050	4908	7180044128050	scf7180044128050	4908
7180044133456	scf7180044133456	6373	7180044133456	scf7180044133456	6373
7180044134534	scf7180044134534	4060	7180044134534	scf7180044134534	4060
7180044134535	scf7180044134535	5066	7180044134535	scf7180044134535	5066
7180044138066	scf7180044138066	5105	7180044138066	scf7180044138066	5105
7180044155553	scf7180044155553	3949	7180044155553	scf7180044155553	3949
7180044209722	scf7180044209722	3698	7180044209722	scf7180044209722	3698
7180044236102	scf7180044236102	2551	7180044236102	scf7180044236102	2551
7180044680283	scf7180044680283	3524	7180044680283	scf7180044680283	3524
7180044682364	scf7180044682364	4191	7180044682364	scf7180044682364	4191
7180044684081	scf7180044684081	4510	7180044684081	scf7180044684081	4510
7180044684847	scf7180044684847	5640	7180044684847	scf7180044684847	5640
7180044686304	scf7180044686304	4517	7180044686304	scf7180044686304	4517
7180044689982	scf7180044689982	2540	7180044689982	scf7180044689982	2540
7180044690651	scf7180044690651	4461	7180044690651	scf7180044690651	4461
7180044690912	scf7180044690912	3317	7180044690912	scf7180044690912	3317
7180044691729	scf7180044691729	4058	7180044691729	scf7180044691729	4058
7180044697643	scf7180044697643	5154	7180044697643	scf7180044697643	5154
7180044703488	scf7180044703488	4553	7180044703488	scf7180044703488	4553
7180044707871	scf7180044707871	4389	7180044707871	scf7180044707871	4389
7180044735823	scf7180044735823	2719	7180044735823	scf7180044735823	2719
7180044737013	scf7180044737013	3661	7180044737013	scf7180044737013	3661
7180044744262	scf7180044744262	4287	7180044744262	scf7180044744262	4287
7180044745789	scf7180044745789	4725	7180044745789	scf7180044745789	4725
7180044746433	scf7180044746433	2840	7180044746433	scf7180044746433	2840
7180044769026	scf7180044769026	3244	7180044769026	scf7180044769026	3244
7180044771821	scf7180044771821	2981	7180044771821	scf7180044771821	2981
7180044773788	scf7180044773788	2990	7180044773788	scf7180044773788	2990
7180044774118	scf7180044774118	3756	7180044774118	scf7180044774118	3756
7180044898120	scf7180044898120	1248	7180044898120	scf7180044898120	1248
7180044912620	scf7180044912620	1311	7180044912620	scf7180044912620	1311
7180044943173	scf7180044943173	1291	7180044943173	scf7180044943173	1291
7180044966580	scf7180044966580	1858	7180044966580	scf7180044966580	1858
7180045527545	scf7180045527545	3143	7180045050770	scf7180045050770	846
7180045529631	scf7180045529631	4184	7180045527545	scf7180045527545	3143
7180045531272	scf7180045531272	3844	7180045529631	scf7180045529631	4184
7180045532710	scf7180045532710	5364	7180045531272	scf7180045531272	3844
7180045533954	scf7180045533954	3187	7180045532710	scf7180045532710	5364
7180045534012	scf7180045534012	3295	7180045533954	scf7180045533954	3187
7180045538187	scf7180045538187	4318	7180045534012	scf7180045534012	3295
7180045538898	scf7180045538898	3561	7180045538187	scf7180045538187	4318
7180045547170	scf7180045547170	3289	7180045538898	scf7180045538898	3561
7180045548507	scf7180045548507	4188	7180045547170	scf7180045547170	3289
7180045564805	scf7180045564805	4618	7180045548507	scf7180045548507	4188
7180045565985	scf7180045565985	5042	7180045564805	scf7180045564805	4618
7180045580271	scf7180045580271	3324	7180045565985	scf7180045565985	5042
7180045587131	scf7180045587131	3663	7180045580271	scf7180045580271	3324
7180045590894	scf7180045590894	4338	7180045587131	scf7180045587131	3663
7180045592182	scf7180045592182	4026	7180045590894	scf7180045590894	4338
7180045620138	scf7180045620138	2438	7180045592182	scf7180045592182	4026
7180045628270	scf7180045628270	3353	7180045620138	scf7180045620138	2438
7180045629759	scf7180045629759	2761	7180045628270	scf7180045628270	3353
7180046728187	scf7180046728187	3332	7180045629759	scf7180045629759	2761
7180046730009	scf7180046730009	3948	7180046302773	scf7180046302773	808
7180046730348	scf7180046730348	2938	7180046388415	scf7180046388415	508
7180046752351	scf7180046752351	3222	7180046728187	scf7180046728187	3332
7180046753180	scf7180046753180	2967	7180046730009	scf7180046730009	3948
7180046756028	scf7180046756028	2910	7180046730348	scf7180046730348	2938
7180046770881	scf7180046770881	4461	7180046752351	scf7180046752351	3222
7180046785064	scf7180046785064	3634	7180046753180	scf7180046753180	2967
7180046793872	scf7180046793872	2369	7180046756028	scf7180046756028	2910
7180046812034	scf7180046812034	2889	7180046770881	scf7180046770881	4461
7180046813258	scf7180046813258	2477	7180046785064	scf7180046785064	3634
7180046816278	scf7180046816278	3437	7180046793872	scf7180046793872	2369
7180046825955	scf7180046825955	2746	7180046812034	scf7180046812034	2889
7180046855562	scf7180046855562	2458	7180046813258	scf7180046813258	2477
7180046952905	scf7180046952905	1559	7180046816278	scf7180046816278	3437
7180047160251	scf7180047160251	1239	7180046825955	scf7180046825955	2746
7180048403789	scf7180048403789	2220	7180046855562	scf7180046855562	2458
7180048417602	scf7180048417602	2659	7180046952905	scf7180046952905	1559
7180048437854	scf7180048437854	3101	7180047160251	scf7180047160251	1239
7180048439906	scf7180048439906	2448	7180048403789	scf7180048403789	2220
7180048440485	scf7180048440485	3532	7180048417602	scf7180048417602	2659
7180048444103	scf7180048444103	2817	7180048437854	scf7180048437854	3101
7180048456905	scf7180048456905	2854	7180048439906	scf7180048439906	2448
7180048460522	scf7180048460522	3092	7180048440485	scf7180048440485	3532
7180048464245	scf7180048464245	3166	7180048444103	scf7180048444103	2817
7180048469075	scf7180048469075	2580	7180048456905	scf7180048456905	2854
7180048477801	scf7180048477801	2699	7180048460522	scf7180048460522	3092
7180048496221	scf7180048496221	2537	7180048464245	scf7180048464245	3166
7180048509330	scf7180048509330	2720	7180048469075	scf7180048469075	2580
7180048515927	scf7180048515927	1838	7180048477801	scf7180048477801	2699
7180048697209	scf7180048697209	1334	7180048496221	scf7180048496221	2537
7180050625254	scf7180050625254	2139	7180048509330	scf7180048509330	2720
7180050630530	scf7180050630530	2060	7180048515927	scf7180048515927	1838
7180050632747	scf7180050632747	2278	7180048697209	scf7180048697209	1334
7180050656228	scf7180050656228	1155	7180048744466	scf7180048744466	777
7180050890014	scf7180050890014	1729	7180050625254	scf7180050625254	2139
7180051018318	scf7180051018318	2801	7180050630530	scf7180050630530	2060
			7180050632747	scf7180050632747	2278
			7180050656228	scf7180050656228	1155
			7180050890014	scf7180050890014	1729
			7180051018318	scf7180051018318	2801
